# Supplementary material for: Assembly of the 373k gene space of the polyploid sugarcane genome reveals reservoirs of functional diversity in the world's leading biomass crop
Source: PubMed Central journal article supplement (PMC6884061; doi:10.1093/gigascience/giz129), 2019-11-29
Supplement: giz129_giga-d-19-00013_original_submission.pdf [file giz129_giga-d-19-00013_original_submission.pdf]

# GigaScience

## Assembly of the 373K gene space of the polyploid sugarcane genome reveals reservoirs of functional diversity in the world's leading biomass crop

--Manuscript Draft--

|                             |                                                                                                                                                                                                                                                                                                                                                                                                                                                                                                                                                                                         |                                |
|-----------------------------|-----------------------------------------------------------------------------------------------------------------------------------------------------------------------------------------------------------------------------------------------------------------------------------------------------------------------------------------------------------------------------------------------------------------------------------------------------------------------------------------------------------------------------------------------------------------------------------------|--------------------------------|
| <b>Manuscript Number:</b>   | GIGA-D-19-00013                                                                                                                                                                                                                                                                                                                                                                                                                                                                                                                                                                         |                                |
| <b>Full Title:</b>          | Assembly of the 373K gene space of the polyploid sugarcane genome reveals reservoirs of functional diversity in the world's leading biomass crop                                                                                                                                                                                                                                                                                                                                                                                                                                        |                                |
| <b>Article Type:</b>        | Research                                                                                                                                                                                                                                                                                                                                                                                                                                                                                                                                                                                |                                |
| <b>Funding Information:</b> | FAPESP (2012/51062-3)                                                                                                                                                                                                                                                                                                                                                                                                                                                                                                                                                                   | Professor Glaucia Mendes Souza |
|                             | FAPESP (2008/52146-0)                                                                                                                                                                                                                                                                                                                                                                                                                                                                                                                                                                   | Professor Glaucia Mendes Souza |
|                             | FAPESP (2014/50921-8)                                                                                                                                                                                                                                                                                                                                                                                                                                                                                                                                                                   | Professor Glaucia Mendes Souza |
|                             | FAPESP (2008/52074-0)                                                                                                                                                                                                                                                                                                                                                                                                                                                                                                                                                                   | Not applicable                 |
|                             | FAPESP (2011/50761-2)                                                                                                                                                                                                                                                                                                                                                                                                                                                                                                                                                                   | Not applicable                 |
|                             | National Science Foundation (DBI-1350041)                                                                                                                                                                                                                                                                                                                                                                                                                                                                                                                                               | Not applicable                 |
|                             | CNPq (304360/2014-7)                                                                                                                                                                                                                                                                                                                                                                                                                                                                                                                                                                    | Professor Glaucia Mendes Souza |
|                             | CNPq (308197/2010-0)                                                                                                                                                                                                                                                                                                                                                                                                                                                                                                                                                                    | Not applicable                 |
|                             | FAPESP (2015/22993-7)                                                                                                                                                                                                                                                                                                                                                                                                                                                                                                                                                                   | Not applicable                 |
|                             | FAPESP (2013/18322-4)                                                                                                                                                                                                                                                                                                                                                                                                                                                                                                                                                                   | Not applicable                 |
|                             | FAPESP (2015/15346-5)                                                                                                                                                                                                                                                                                                                                                                                                                                                                                                                                                                   | Not applicable                 |
|                             | CNPq (159094/2014-3)                                                                                                                                                                                                                                                                                                                                                                                                                                                                                                                                                                    | Not applicable                 |
|                             | FAPESP (2017/02270-6)                                                                                                                                                                                                                                                                                                                                                                                                                                                                                                                                                                   | Not applicable                 |
|                             | CAPES (DS-1454337)                                                                                                                                                                                                                                                                                                                                                                                                                                                                                                                                                                      | Not applicable                 |
|                             | FAPESP (2013/23048-9)                                                                                                                                                                                                                                                                                                                                                                                                                                                                                                                                                                   | Not applicable                 |
|                             | FAPESP (2016/06917-1)                                                                                                                                                                                                                                                                                                                                                                                                                                                                                                                                                                   | Not applicable                 |
|                             | FAPESP (2013/07467-1)                                                                                                                                                                                                                                                                                                                                                                                                                                                                                                                                                                   | Not applicable                 |
|                             | FAPESP (2017/02842-0)                                                                                                                                                                                                                                                                                                                                                                                                                                                                                                                                                                   | Not applicable                 |
|                             | CNPq (309566/2015-0)                                                                                                                                                                                                                                                                                                                                                                                                                                                                                                                                                                    | Not applicable                 |
|                             | National Science Foundation (IOS/0115903)                                                                                                                                                                                                                                                                                                                                                                                                                                                                                                                                               | Not applicable                 |
|                             | National Institutes of Health (R01-HG006677)                                                                                                                                                                                                                                                                                                                                                                                                                                                                                                                                            | Not applicable                 |
| <b>Abstract:</b>            | <p><b>Background</b><br/>Sugarcane cultivars are polyploid interspecific hybrids of giant genomes, typically with 10-13 sets of chromosomes from two <i>Saccharum</i> species. The ploidy, hybridity and size of the genome, estimated to have in excess of 10 Gb, pose a great challenge for sequencing.</p> <p><b>Results</b><br/>Here we present a gene-space assembly of SP80-3280, including 373,869 putative genes and their potential regulatory regions. Their alignment to single copy genes of diploid grasses indicates that we could resolve 2-6 (up to 15) gene copies</p> |                                |

|                                                      |                                                                                                                                                                                                                                                                                                                                                                                                                                                                                                                                                                                                                                                                                                                                                                                                                                                                                                                                                                                                                                                                                                                                                                                                         |
|------------------------------------------------------|---------------------------------------------------------------------------------------------------------------------------------------------------------------------------------------------------------------------------------------------------------------------------------------------------------------------------------------------------------------------------------------------------------------------------------------------------------------------------------------------------------------------------------------------------------------------------------------------------------------------------------------------------------------------------------------------------------------------------------------------------------------------------------------------------------------------------------------------------------------------------------------------------------------------------------------------------------------------------------------------------------------------------------------------------------------------------------------------------------------------------------------------------------------------------------------------------------|
|                                                      | <p>(homo/homeolog) that are 99.1% identical within their coding sequences. Dissimilarities increase in their regulatory regions and gene promoter analysis shows differences in regulatory elements within gene families and are species-specific expressed. We exemplify these differences for sucrose synthase (SuSy) and phenylalanine ammonia-lyase (PAL), two gene families central to carbon partitioning. SP80-3280 have particular regulatory elements involved in sucrose synthesis not found in the ancestor <i>S. spontaneum</i>. PAL regulatory elements are found in co-expressed genes related to fiber synthesis within gene networks defined during plant growth and maturation. Comparison to sorghum reveals predominantly biallelic variations in sugarcane, consistent with the formation of two 'subgenomes' after their divergence ca. 3.8~4.6 MYA and reveals SNVs that may underlie their differences.</p> <p><b>Conclusions</b></p> <p>This gene-copy resolved assembly represents a large step towards a whole genome assembly of a commercial sugarcane cultivar providing a large diversity of genes and homo(eo)logs useful for improving biomass and food production.</p> |
| <b>Corresponding Author:</b>                         | <p>Glauca Mendes Souza, Ph.D<br/> Universidade de São Paulo<br/> Sao Paulo, SP BRAZIL</p>                                                                                                                                                                                                                                                                                                                                                                                                                                                                                                                                                                                                                                                                                                                                                                                                                                                                                                                                                                                                                                                                                                               |
| <b>Corresponding Author Secondary Information:</b>   |                                                                                                                                                                                                                                                                                                                                                                                                                                                                                                                                                                                                                                                                                                                                                                                                                                                                                                                                                                                                                                                                                                                                                                                                         |
| <b>Corresponding Author's Institution:</b>           | <p>Universidade de São Paulo</p>                                                                                                                                                                                                                                                                                                                                                                                                                                                                                                                                                                                                                                                                                                                                                                                                                                                                                                                                                                                                                                                                                                                                                                        |
| <b>Corresponding Author's Secondary Institution:</b> |                                                                                                                                                                                                                                                                                                                                                                                                                                                                                                                                                                                                                                                                                                                                                                                                                                                                                                                                                                                                                                                                                                                                                                                                         |
| <b>First Author:</b>                                 | <p>Glauca Mendes Souza, Ph.D</p>                                                                                                                                                                                                                                                                                                                                                                                                                                                                                                                                                                                                                                                                                                                                                                                                                                                                                                                                                                                                                                                                                                                                                                        |
| <b>First Author Secondary Information:</b>           |                                                                                                                                                                                                                                                                                                                                                                                                                                                                                                                                                                                                                                                                                                                                                                                                                                                                                                                                                                                                                                                                                                                                                                                                         |
| <b>Order of Authors:</b>                             | <p>Glauca Mendes Souza, Ph.D</p> <p>Marie-Anne Van Sluys, Ph.D</p> <p>Carolina Gimiliani Lembke, Ph.D</p> <p>Hayan Lee, Ph.D</p> <p>Gabriel Rodrigues Alves Margarido, Ph.D</p> <p>Carlos Takeshi Hotta, Ph.D</p> <p>Jonas Weissmann Gaiarsa, Ph.D</p> <p>Augusto Lima Diniz, Ph.D</p> <p>Mauro de Medeiros Oliveira, Ph.D</p> <p>Sávio de Siqueira Ferreira, Ph.D</p> <p>Milton Yutaka Nishiyama-Jr, Ph.D</p> <p>Felipe ten Caten, Ph.D</p> <p>Geovani Tolfo Ragagnin, MSc</p> <p>Pablo de Moraes Andrade, Ph.D</p> <p>Robson Francisco de Souza, Ph.D</p> <p>Gianluca Gonçalves Nicastro, Ph.D</p> <p>Ravi Pandya, BS.c</p> <p>Changsoo Kim, Ph.D</p> <p>Hui Guo, Ph.D</p> <p>Alan Mitchell Durham, Ph.D</p> <p>Monalisa Sampaio Carneiro, Ph.D</p> <p>Jisen Zhang, Ph.D</p> <p>Qing Zhang, Ph.D</p>                                                                                                                                                                                                                                                                                                                                                                                                  |

|                                                                                                                                                                                                                                                                                                                                                                                                                                                                                                                                     |                       |
|-------------------------------------------------------------------------------------------------------------------------------------------------------------------------------------------------------------------------------------------------------------------------------------------------------------------------------------------------------------------------------------------------------------------------------------------------------------------------------------------------------------------------------------|-----------------------|
|                                                                                                                                                                                                                                                                                                                                                                                                                                                                                                                                     | Qing Zhang, Ph.D      |
|                                                                                                                                                                                                                                                                                                                                                                                                                                                                                                                                     | Ray Ming, Ph.D        |
|                                                                                                                                                                                                                                                                                                                                                                                                                                                                                                                                     | Michael Schatz, Ph.D  |
|                                                                                                                                                                                                                                                                                                                                                                                                                                                                                                                                     | Bob Davidson          |
|                                                                                                                                                                                                                                                                                                                                                                                                                                                                                                                                     | Andrew Paterson, Ph.D |
|                                                                                                                                                                                                                                                                                                                                                                                                                                                                                                                                     | David Heckerman, Ph.D |
| <b>Order of Authors Secondary Information:</b>                                                                                                                                                                                                                                                                                                                                                                                                                                                                                      |                       |
| <b>Additional Information:</b>                                                                                                                                                                                                                                                                                                                                                                                                                                                                                                      |                       |
| <b>Question</b>                                                                                                                                                                                                                                                                                                                                                                                                                                                                                                                     | <b>Response</b>       |
| Are you submitting this manuscript to a special series or article collection?                                                                                                                                                                                                                                                                                                                                                                                                                                                       | No                    |
| <p><b>Experimental design and statistics</b></p> <p>Full details of the experimental design and statistical methods used should be given in the Methods section, as detailed in our <a href="#">Minimum Standards Reporting Checklist</a>. Information essential to interpreting the data presented should be made available in the figure legends.</p> <p>Have you included all the information requested in your manuscript?</p>                                                                                                  | Yes                   |
| <p><b>Resources</b></p> <p>A description of all resources used, including antibodies, cell lines, animals and software tools, with enough information to allow them to be uniquely identified, should be included in the Methods section. Authors are strongly encouraged to cite <a href="#">Research Resource Identifiers</a> (RRIDs) for antibodies, model organisms and tools, where possible.</p> <p>Have you included the information requested as detailed in our <a href="#">Minimum Standards Reporting Checklist</a>?</p> | Yes                   |
| <p><b>Availability of data and materials</b></p> <p>All datasets and code on which the</p>                                                                                                                                                                                                                                                                                                                                                                                                                                          | Yes                   |

conclusions of the paper rely must be either included in your submission or deposited in [publicly available repositories](#) (where available and ethically appropriate), referencing such data using a unique identifier in the references and in the “Availability of Data and Materials” section of your manuscript.

Have you have met the above requirement as detailed in our [Minimum Standards Reporting Checklist](#)?

[Click here to view linked References](#)

# 1 Assembly of the 373K gene space of the polyploid sugarcane genome reveals reservoirs of 1 2 functional diversity in the world's leading biomass crop

3

4

5

6

7

8

9

10

11

12

13

14

15

16

17

18

19

20

21

22

23

24

25

26

27

28

29

30

31

32

33

34

35

36

37

38

39

40

41

42

43

44

45

46

47

48

49

50

51

52

53

54

55

56

57

58

59

60

61

62

63

64

65

| Full name                         | Institutional address | e-mail                     |
|-----------------------------------|-----------------------|----------------------------|
| Glaucia Mendes Souza*             | 1                     | glmsouza@iq.usp.br         |
| Marie-Anne Van Sluys*             | 2                     | mavsluys@usp.br            |
| Carolina Gimiliani Lembke         | 1                     | carolina.lembke@gmail.com  |
| Hayan Lee                         | 3,4                   | hayan.lee@stanford.edu     |
| Gabriel Rodrigues Alves Margarido | 5                     | gramarga@usp.br            |
| Carlos Takeshi Hotta              | 1                     | hotta@iq.usp.br            |
| Jonas Weissmann Gaiarsa           | 2                     | jonaswg@gmail.com          |
| Augusto Lima Diniz                | 1                     | augustold@usp.br           |
| Mauro de Medeiros Oliveira        | 1                     | mauromedeiros@usp.br       |
| Sávio de Siqueira Ferreira        | 1,2                   | saviobqi@gmail.com         |
| Milton Yutaka Nishiyama-Jr        | 1,6                   | yutakajr@gmail.com         |
| Felipe ten Caten                  | 1                     | ftencaten@gmail.com        |
| Geovani Tolfo Ragagnin            | 2                     | geovaniragagnin@gmail.com  |
| Pablo de Morais Andrade           | 1                     | pablo.andrade@gmail.com    |
| Robson Francisco de Souza         | 7                     | rfsouza@usp.br             |
| Gianluca Gonçalves Nicastro       | 7                     | nicastro@iq.usp.br         |
| Ravi Pandya                       | 8                     | ravip@microsoft.com,       |
| Changsoo Kim                      | 9,10                  | changsookim@cnu.ac.kr      |
| Hui Guo                           | 9                     | huiguo7@gmail.com          |
| Alan Mitchell Durham              | 11                    | aland@usp.br               |
| Monalisa Sampaio Carneiro         | 12                    | monalisa@ufscar.br         |
| Jisen Zhang                       | 13                    | zjisen@126.com             |
| Xingtang Zhang                    | 13                    | tanger_009@163.com         |
| Qing Zhang                        | 13                    | zhangqing970@126.com       |
| Ray Ming                          | 13,14                 | rayming@illinois.edu       |
| Michael C. Schatz                 | 3,15                  | michael.schatz@gmail.com   |
| Bob Davidson                      | 8                     | bob.davidson@microsoft.com |
| Andrew Paterson                   | 9                     | paterson@uga.edu           |
| David Heckerman                   | 8                     | heckerma@hotmail.com       |

1 – Departamento de Bioquímica, Instituto de Química, Universidade de São Paulo, Av. Prof. Lineu Prestes,

748, São Paulo, SP 05508-000, Brazil

2 – Departamento de Botânica, Instituto de Biociências, Universidade de São Paulo, Rua do Matão, 277, São

Paulo, SP 05508-090, Brazil

3 – Cold Spring Harbor Laboratory, One Bungtown Road, Koch Building #1119, Cold Spring Harbor, NY

11724, United States of America

- 11 4 – Department of Energy Joint Genome Institute, 2800 Mitchell Drive, Walnut Creek, CA CA 94598, United  
12 States of America  
2  
313 5 – Departamento de Genética, Escola Superior de Agricultura Luiz de Queiroz, Universidade de São Paulo,  
4  
514 Avenida Pádua Dias, 11, Piracicaba, SP 13418-900, Brazil  
6  
715 6 – Laboratório Especial de Toxinologia Aplicada, Instituto Butantan, Av. Vital Brasil, 1500, São Paulo, SP  
8  
916 05503-900, Brazil  
10  
1117 7 – Departamento de Microbiologia, Instituto de Ciências Biomédicas, Universidade de São Paulo, Av.  
13  
1418 Professor Lineu Prestes, 1734, São Paulo, SP 05508-900, Brazil  
15  
1619 8 – Microsoft Research, One Microsoft Way, Redmond, WA 98052, United States of America9 – Plant  
17  
1820 Genome Mapping Laboratory, University of Georgia, 120 Green Street, Athens, GA 30602-7223, United  
19  
2021 States of America  
21  
2222 10 – Department of Crop Science, Chungnam National University, 99 Daehak Ro Yuseong Gu, Deajeon,  
24  
2523 34134, South Korea  
26  
2724 11 – Departamento de Ciências da Computação, Instituto de Matemática e Estatística, Universidade de São  
28  
3025 Paulo, Rua do Matão, 1010, São Paulo, SP 05508-090, Brazil  
31  
3226 12 - Departamento de Biotecnologia e Produção Vegetal e Animal, Centro de Ciências Agrárias, Universidade  
33  
3427 Federal de São Carlos, Rodovia Washington Luis km 235, Araras, SP 13.565-905, Brazil  
35  
3628 13 – FAFU and UIUC-SIB Joint Center for Genomics and Biotechnology, Fujian Agriculture and Forestry  
37  
3829 University, Shangxiadian Road, Fuzhou 350002, Fujian, China  
40  
4130 14 - Department of Plant Biology, University of Illinois at Urbana-Champaign, 201 W. Gregory Dr. Urbana,  
42  
4331 Urbana, Illinois 61801, USA  
44  
4532 15 – Departments of Computer Science and Biology, Johns Hopkins University, 3400 North Charles Street,  
46  
4733 Baltimore, MD 21218-2608, United States of America  
48  
49  
5034  
51

5235 \*These authors contributed equally to this work and are co-corresponding authors: [glmsouza@iq.usp.br](mailto:glmsouza@iq.usp.br) and  
53  
5436 [mavsluys@usp.br](mailto:mavsluys@usp.br)  
55

56  
5737  
58  
5938  
60  
6139  
62  
63  
64  
65

40 **ABSTRACT**

41

2

342 **Background**

4

543 Sugarcane cultivars are polyploid interspecific hybrids of giant genomes, typically with 10-13 sets of  
6  
744 chromosomes from two *Saccharum* species. The ploidy, hybridity and size of the genome, estimated to have  
8  
9  
1045 in excess of 10 Gb, pose a great challenge for sequencing.

11

1246 **Results**

13

1447 Here we present a gene-space assembly of SP80-3280, including 373,869 putative genes and their potential  
15  
1648 regulatory regions. Their alignment to single copy genes of diploid grasses indicates that we could resolve 2-  
17  
18  
1949 6 (up to 15) gene copies (homo/homeolog) that are 99.1% identical within their coding sequences.  
20  
2150 Dissimilarities increase in their regulatory regions and gene promoter analysis shows differences in regulatory  
22  
2351 elements within gene families and are species-specific expressed. We exemplify these differences for sucrose  
24  
2552 synthase (SuSy) and phenylalanine ammonia-lyase (PAL), two gene families central to carbon partitioning.  
26  
2753 SP80-3280 have particular regulatory elements involved in sucrose synthesis not found in the ancestor *S.*  
28  
29  
3054 *spontaneum*. PAL regulatory elements are found in co-expressed genes related to fiber synthesis within gene  
31  
3255 networks defined during plant growth and maturation. Comparison to sorghum reveals predominantly biallelic  
33  
3456 variations in sugarcane, consistent with the formation of two ‘subgenomes’ after their divergence ca. 3.8~4.6  
35  
36  
3757 MYA and reveals SNVs that may underlie their differences.

38

3958 **Conclusions**

40

4159 This gene-copy resolved assembly represents a large step towards a whole genome assembly of a commercial  
42  
4360 sugarcane cultivar providing a large diversity of genes and homo(eo)logs useful for improving biomass and  
44  
45  
4661 food production.

47

4862

49

5063 **Keywords:** Allele; Bioenergy; Biomass; Genome; Polyploid

51

5264

53

5465

55

5666

57

5867

60

6168

62

63

64

65

## 69 BACKGROUND

170 Sugarcane is the world's most cultivated crop in tonnage (more than rice, maize and wheat) [1], and is  
2  
371 considered the most sustainable of energy crops [2] with high potential to mitigate climate change without  
4  
572 affecting food security [3]. Already produced in over 100 countries, high productivity of sugar, bioethanol and  
6  
773 bioelectricity [4] make it a highly expandable green alternative to petroleum [5–7]. The International Energy  
8  
974 Agency projects a 150 EJ (17% of energy demand) contribution of bioenergy by 2060, delivering 18% of the  
11  
1275 emission reductions needed to achieve the 2DS (2°C Scenario). Sugarcane bioenergy production by 2045 could  
13  
1476 displace up to 13.7% of crude oil consumption and 5.6% of the world's CO<sub>2</sub> emissions relative to 2014. This  
15  
1677 can be achieved without using forest preservation areas or land necessary for food production systems.  
17  
1878 Additionally, the myriad of products that can derive from sugarcane biomass [8] further enhance opportunities  
19  
20  
2179 for sugarcane in a portfolio of technologies needed to transition to a low carbon 'bioeconomy'.

22  
2380 Opportunities to accelerate breeding progress and enrich knowledge of the fundamental biology of this  
24  
2581 important plant motivate efforts to produce a high-quality reference genome, a challenge that is unusually  
26  
2782 complex. Unlike wheat cultivated species known to be either tetraploid (AABB) or hexaploid (AABBDD), the  
28  
29  
3083 *Saccharum* (sugarcane) genus is considered to be a species complex. A recent study [9] proposed independent  
31  
3284 polyploidization events within *Saccharum* after divergence from the last ancestor shared with *Sorghum*,  
33  
3485 superimposed upon an additional whole genome duplication since the diversification of grasses. As a  
35  
3686 consequence, the sugarcane genome is redundant and harbors genes in multiple functional copies. Adding  
37  
38  
3987 further complexity, sugarcane cultivars are polyploid interspecific hybrids, typically with 10-13 sets of their  
40  
4188 10 basic chromosomes, 80-85% from *Saccharum officinarum* (2n=80), which is known for its sweetness, 10-  
42  
4389 15% from *S. spontaneum* (2n=40-128) known for its robustness, and ~5% with recombined chromosomes  
44  
4590 between those two progenitors [10,11]. The ploidy, hybridity and sheer size of the genome, estimated to have  
46  
47  
4891 in excess of 10 Gb, pose a great challenge for sequencing [12]. Recently released sequences of the modern  
49  
5092 cultivar R570 yielded a mosaic monoploid reference (382 Mb single tiling path) [13] and a *S. spontaneum*  
51  
5293 AP85-441 haploid assembly (3.13 Gb) [14].

53  
5494 Worldwide sugarcane yield (~84 ton/ha) is currently only ~20% of the theoretical potential yield (~381  
55  
5695 ton/ha), spurring great interest in conventional or molecular breeding approaches to improve yield. However,  
57  
58  
5996 progress by conventional breeding towards closing the gap between current and potential yield has been slow  
60  
6197 with yield gains in the order of 1.0–1.5% a year [15]. Sugarcane commercial cultivars distribute roughly one



98 third of their carbon into sucrose and two thirds into tops and stems which, due to high lignin content, are  
99 burned to fuel boilers, contributing to the favorable energy balance of industrial processes [16]. As sugarcane  
100 can accumulate large amounts of sucrose in its stems, up to ~650 mM [17], it is important to study sucrose  
101 metabolism and the key players in its regulation. Also, of interest is the revealing of regulators of cell wall  
102 biosynthesis. Altering these pathways may help shift carbon partitioning from sucrose storage to biomass  
103 accumulation, rich in fiber content, mostly composed of secondary cell walls formed by cellulose,  
104 hemicellulose and lignin [18]. The latter compound is a hydrophobic polymer that provides strength and  
105 rigidity to the plant, but also is responsible for cell wall recalcitrance, which is the natural plant resistance to  
106 hydrolytic attacks that hampers cellulosic ethanol production [19].

## 109 RESULTS

### 111 The SP80-3280 assembly reveals a gene space of 373,869 genes

112 Here, we report a representative gene space assembly of the genome sequence of SP80-3280 (GenBank  
113 accession number QPEU01000000), the cultivar used in Brazilian breeding programs with the largest  
114 collection of transcriptomic data available [20]. On average, 6 sugarcane haplotypes, putatively homo(eo)logs,  
115 could be resolved from 4.26 Gb of assembled data and 373,869 putative genes and promoter regions. This is  
116 the first release of a resolved gene assembly of such a giant hybrid polyploid genome and their potential  
117 regulatory regions.

118 The assembly was constructed using 26 libraries sequenced using Illumina Synthetic Long-Read  
119 technology, obtaining 19 Gb, ~19x haploid genome coverage (~1.9X genome coverage) with >99% of bases  
120 having >99% accuracy (**Additional file 1: Fig. S1**). The final assembly includes 450,609 contigs (unitigs +  
121 singletons), with average length of 9,452 bp and NG50 of 41,394 bp (**Table 1**), adding over 3Gb of sequence  
122 not previously reported (**Additional file 2: Table S1**) [21]. The gene space described here is organized in the  
123 SUCEST-FUN public database (<http://sucest-fun.org/wsapp/>).

124 Several indicators support the comprehensiveness of the SP80-3280 gene space: (i) among 39,441  
125 sorghum transcripts, 39,207 (99.4%) matched the assembly, at least partially; of these, 71.1% matched at least  
126 one sugarcane contig with 90% or higher coverage (**Additional file 1: Fig. S2**); (ii) the assembly completely

127 covers 217 (87.5%) of the 248 ultra-conserved Core Eukaryotic Genes Mapping Approach (CEGMA) [22]  
128 proteins, and partly covers 18 (7.3%), with only 13 (5.2%) not detected (**Additional file 2: Table S2**); (iii)  
129 among 1,440 genes in the Benchmarking Universal Single-Copy Orthologs (BUSCO) [23] Plantae lineage, the  
130 assembly completely covers 1,309 (90.9%) and partially covers 53 (3.7%) (**Additional file 2: Table S3**). By  
131 including tBLASTn of the 78 (5.4%) missing Plantae lineage BUSCO genes, only 8 (0.5%) are absent; (iv)  
132 assembled chloroplast (MG969494) and mitochondrial (MG969495 and MG969496) genomes were over 99%  
133 similar (at gene level) to published *Saccharum* genomes [24–26]; and (v) 94.9% of 134,840 SP80-3280  
134 expressed sequence tags (ESTs) match the assembled gene-space sequence.

135 The assembly revealed 373,869 putative genes with 374,774 transcripts (**Table 1**), far more than the  
136 72,269 unigenes inferred from six sugarcane genotypes [27]; 85,151 transcripts of sugarcane genotypes with  
137 contrasting lignin contents [28]; and 195,765 transcripts inferred from *de novo* assembly of ORFeomes from  
138 *S. officinarum*, *S. spontaneum* and SP80-3280 [29]. The number of genes, high quality of alignments, and the  
139 following analysis indicates that the assembly provides a high-quality resolution of homo(eo)logs genes.

140 Among the predicted transcripts, 302,627 (80.7%) aligned to a Uniref50 protein [30], and 195,651 were  
141 annotated with 10,362 GO terms [31] (**Additional file 1: Fig. S3**). Our previously published SP80-3280  
142 ORFeome was reassembled using the genome as a reference, revealing 269,050 genes and 275,807 transcripts  
143 from leaves, immature and intermediate internodes (**Additional file 2: Table S4**). Further, a set of 134,840  
144 SP80-3280 ESTs from a Sugarcane EST Project – SUCEST [20] – were mapped to assembled contigs and  
145 compared to predicted genes, in order to further estimate the completeness of the predicted gene space. A total  
146 of 127,940 ESTs (94.9%) have at least one match in the assembly, which is in accordance with similar analysis  
147 of other plant genomes [32], and only 7.6% of aligned ESTs (9,772) do not correspond with predicted genes.  
148 This result resembles the BUSCO results, for which only 5.4% of conserved genes could not be identified in  
149 the assembly. Performing the same approach using a set of 43,141 sugarcane assembled sequences (SAS) –  
150 derived from an EST project [20] – produces similar results regarding the overall alignment rate, with 93% of  
151 the sequences (40,147) matching at least one location in contigs. It is important to note that the SUCEST  
152 database included ESTs from 10 sugarcane cultivars including SP80-3280 which may explain the reduced  
153 correspondence with genic regions, with 16% of aligned SAS having no correspondence to predicted genes of  
154 SP80-3280.

155 To verify how the assembled genes reflected the expected content of homo(eo)logs genes, the gene content  
156 was compared to those of other grasses. Single-copy genes from diploid grasses (sorghum, rice and  
2  
157 *Brachypodium*) are present in up to 15 copies in sugarcane, mostly with 2-6 copies (total of 1,592 coding  
4  
158 sequences (CDS) in sugarcane) (**Fig. 1A**). Dissimilarities among gene copies increase from the coding region  
6  
159 to the promoter region, with median divergence of 0.90% between CDS, 1.03% for the 100 nucleotides (nt)  
8  
160 upstream, 4.47% for 500 nt and 7.50% for 1,000 nt (**Fig. 1B**). Frame-preserving INDELS are more abundant  
10  
161 than frameshifts (**Fig. 1C**) and short frameshift INDELS were relatively less frequent in the sugarcane exons  
13  
162 than in sorghum [33].  
15

16  
163  
17

### 164 **Differential homo(eo)logs expression is observed**

20  
2165 The SP80-3280 gene series that correspond to diploid grass single-copy genes showed expression of sense  
22  
2166 copies for multiple homo(eo)logs (**Fig. 2A**), with very few copies transcribed in antisense orientation (**Fig.**  
24  
2167 **2B**) based on alignment with the SP80-3280 cDNA reads [29] from leaves, immature and intermediate  
26  
2168 internodes. For some genes, not all copies are expressed in SP80-3280 (**Fig. 2A, Additional file 1: Fig. S4**).  
29  
3169 The number of expressed homo(eo)logs is different across the three tissues (**Additional file 1: Fig. S4A**). This  
31  
3170 difference among copies is consistent with the divergence of upstream regions (putatively gene promoter  
33  
3171 regions). The increase in the number of expressed copies is not accompanied by an increase in the level of  
35  
3172 expression (**Additional file 1: Fig. S4B**).  
38

3973 As an example of the complexities in data mining of such a complex gene-space for future reference, we  
40  
4174 offer an example using some well-known genes involved in biomass production.  
42

43  
44  
45

### 4676 **Gene family analysis of SuSy and PAL shows differences in their regulatory regions in SP80-3280 and** 47 4877 ***S. spontaneum***

49  
5178 Sucrose Synthases (SuSy) catalyze the reversible breakdown of sucrose into UDP-glucose and fructose in  
51  
5179 carbon partitioning [34]. In agreement with previous work on sugarcane progenitors [35] (*S. officinarum*, *S.*  
53  
5180 *robustum* and *S. spontaneum*), phylogenetic analysis of 44 ScSuSy members identified in the SP80-3280  
56  
5181 assembly supports that this hybrid has 5 SuSy genes (hereafter ScSuSy1-5) in three clades: I (ScSuSy1 and 2),  
58  
5182 II (ScSuSy3 and 5) and III (ScSuSy4) (**Fig. 3A**). Sorghum shares these 5 SuSy genes, indicating that they  
60  
61  
62  
63  
64  
65

183 evolved before the sugarcane/sorghum divergence. RNA-Seq data from leaves and internodes of SP80-3280  
184 [29] shows expression of 36 of the 44 ScSuSy members, suggesting ScSuSy1-2 (clade I) and ScSuSy5 might  
2  
185 control carbon flux from source to biomass conversion in stems, as they show higher expression in internodes  
4  
186 than in leaves (**Fig. 3C**).

187 SuSy produces the substrate for cellulose biosynthesis (UDP-glucose) and is commonly associated with  
9  
188 cell wall and cellulose synthesis [36,37]. In view of the myriad of possibilities to convert lignocellulosic  
11  
189 compounds into chemicals and fuels, defining phenylpropanoid biosynthesis pathway members in sugarcane  
13  
190 is of great interest. Phenylalanine ammonia-lyase (PAL), the first enzyme in phenylpropanoid biosynthesis  
15  
191 [38–40], is correlated with lignin content [38–41], a major component of plant cell walls [18], and is responsive  
18  
192 to the ethylene-releasing ripener (ethephon) in both leaf and internode [42].

193 Mapping of predicted proteins from SP80-3280 against the SUCEST-FUN Cell Wall Catalogue [41] (731  
22  
194 transcripts of 20 protein categories) identified 3,054 similar proteins (**Additional file 2: Table S5**), including  
25  
195 47 PAL copies. Phylogenetic analysis together with sorghum, *S. spontaneum* and mosaic monoploid R570  
27  
196 PAL sequences reveals 5 clusters (**Fig. 3B**), each containing at least one representative with a sorghum  
29  
197 ortholog. *S. spontaneum* has 33 putative PAL genes, somewhat more than expected considering that the  
31  
198 sequenced genotype is a tetraploid. The higher number may be due to expansion of PAL members in clade I  
34  
199 that occurred also for sorghum and the sugarcane hybrid genomes of R570 and SP80-3280. Clade V has a  
36  
200 higher number of SP80-3280 PAL members and all except one (ID 37780.4) showed expression evidence (**Fig.**  
38  
201 **3D**). In addition, the CCR (Cinnamoyl-CoA reductase), COMT (Caffeic acid 3-O-methyltransferase) and 4CL  
40  
202 (4-coumarate-CoA ligase) gene families, also related to phenylpropanoid biosynthesis, have much higher  
43  
203 numbers of genes (620, 453 and 375, respectively) in sugarcane than sorghum [43] (44, 41 and 15,  
45  
204 respectively). This is another challenge and opportunity for future functional characterization (**Additional file**  
47  
205 **2: Table S6**).

206 The sheer number of sugarcane genes found so far, the large size of multi-gene families and the finding  
52  
207 that homo(eo)logs are differentially expressed point to a very complex role of regulation in the determination  
54  
208 of phenotypic differences. Consistent with the gene copy-richness of sugarcane, we inferred 15,737  
56  
209 transcription factors (TFs) from 57 families (**Additional file 2: Table S7**), versus ~2,000 previously estimated  
58  
210 [44]. The classification of core promoters and identification of Transcription Factor Binding Sites (TFBSs) in  
61  
62  
63  
64  
65

211 proximal promoters was performed *in silico* and the percentage of core promoter regions with a TATA-box  
212 element was 47.72% and 12.76% for SuSy and PAL genes, respectively. The TFBS identification pointed to a  
213 wealth of regulatory elements differentially distributed among members of the same gene family, i.e. SuSy  
214 and PAL (**Fig. 3C and D and Additional file 2: Table S8**). In addition, using gene expression data of SP80-  
215 3280 plants grown in field conditions for 13 months, we have found evidence of a co-expression module,  
216 enriched for phenylpropanoid and lignin biosynthesis gene ontology terms (**Additional file 1: Fig. S5A**). This  
217 module comprises 116 transcripts, including one PAL (**Additional file 1: Fig. S5B**), whose expression is  
218 higher in internodes 5 and 9, than in leaves and immature internode (**Additional file 1: Fig. S5C**). It was  
219 possible to identify the TFBSs, predicted as putative regulators of the PAL gene family (**Fig. 3D**) within the  
220 upstream region of these co-expressed genes, suggesting that ABF, ERF, ZF-HD/C2H2, and ARF3  
221 (**Additional file 1: Fig. S5D**) may also regulate other genes involved in lignin biosynthesis and metabolism.

222 The most significant motifs found for each gene family (SuSy and PAL) were mapped to the promoter  
223 region of the remaining sequences from both SP80-3280 and R570 hybrids and *S. spontaneum* (**Additional**  
224 **file 2: Table S8c and Table S9**). Interestingly, only ScSuSy2 and ScSuSy3 motifs mapped in all species,  
225 suggesting that SP80-3280 hold particular regulatory elements involved in sucrose synthesis. Conversely,  
226 SP80-3280 and *S. spontaneum* share all predicted motifs for PAL genes (**Additional file 2: Table S9**),  
227 suggesting that this gene family may be derived from the *S. spontaneum* ancestor.

### 228 **Transposable element insertions may affect SuSy and PAL expression**

229 Fewer transposable elements (TE) were identified in SP80-3280 gene space than in the AP85-441 *S.*  
230 *spontaneum* and mosaic monoploid R570 assembly, probably due to repetitive regions collapsing in the  
231 assembly even with the use of long synthetic-read sequencing (**Additional file 1: Fig. S6, Additional file 2:**  
232 **Table S10**). All previously described TE families are represented in the three genome assemblies, disclosing  
233 few cultivar specific amplifications. The two modern cultivars have fewer TE counts than the *S. spontaneum*  
234 progenitor in normalized monoploid genomes. LTR retrotransposons are large contributors to genome  
235 composition at the chromosome assembly level. However, scMaximus (Copia) and scDel (Gypsy) LTR-  
236 retrotransposon families are similarly represented in both gene-space and chromosome assemblies supporting  
237 their presence in transcriptionally active regions [45]. We also note that scCACTA transposons are more  
238 represented at the gene-space assembly than schAT while the scMutator family is similarly represented in both.

240 Functionally important TE insertions were identified in the ScSuSy gene family (**Fig. 3**). ScSuSy2  
241 copies have a contrasting pattern, most *S. spontaneum* having TE insertions while most SP80-3280  
242 homo(eo)logs do not – although SP80-3280 and *S. spontaneum* share one ancient insertion of schAT159 at  
243 similar distances from the ATG. ScSuSy3 genes are polymorphic between species and within SP80-3280, with  
244 6 copies having no TE and 5 in which different TEs may impact expression. In particular,  
245 scga7\_uti\_cns\_0020964:7575-17575 (-) harbors a full LTR at 280 bases from the ATG. Most ScSuSy4 copies  
246 have no TE insertion but interestingly, as described for ScSuSy2, SP80-3280 (scga7\_uti\_cns\_0226458:7638-  
247 16073 (-)) and *S. spontaneum* (Chr1B:33406669-33416669 (-)) share one ancient schAT159 insertion. Finally,  
248 ScSuSy1 has similar patterns of TE presence and absence in both genomes, and ScSuSy5 genes have no  
249 insertions in the promoter regions of either *S. spontaneum* or SP80-3280. Furthermore, PAL genes from clade  
250 I exhibit most of the copy variation and harbor TEs inserted near the promoter region. Only two copies from  
251 SP80-3280 and *S. spontaneum* lack TE insertion in PALs from group I.

### 253 **Sugarcane and sorghum polymorphisms support recent allotetraploidy**

254 Despite a common foundation for evolving high sugar content with similar Susy genes (ScSuSy1-5),  
255 sugarcane and closely related sorghum have taken different paths since sharing ancestry. We identified 4,750  
256 natural SNP variations (SNVs) between sorghum and sugarcane gene regions, mostly bi-allelic (3,840  
257 (80.8%)), but 6.2% tri-allelic (295) and 0.97% tetra-allelic (46) (**Fig. 4**). Further, 1,334 SNVs that differentiate  
258 sugarcane from sorghum in 585 single copy genes include frameshifts, premature splicing, loss of stop codons  
259 and translation initiation (**Additional file 1: Fig. S7, Additional file 2: Table S11**) in genes significantly  
260 enriched in transcription, DNA-dependent cell organization and biogenesis in the nucleus and endoplasmic  
261 reticulum (**Additional file 2: Table S12**) comprise a rich slate of candidates for causes of morphological and  
262 physiological differences between these taxa.

### 264 **The gene-space contribution towards a chromosome level assembly of a sugarcane commercial hybrid**

265 Notwithstanding the fragmented nature of our assembly, we explored how it could contribute beyond the  
266 gene space toward a whole genome assembly of the hybrid sugarcane genome. Previous analysis of grass  
267 genomes revealed extensive conservation of gene order overlaid with a background of small-scale  
268 chromosomal rearrangements and numerous localized gene deletions, insertions and duplications [46].

269 Recently published estimates of the levels of gene synteny between *Sorghum bicolor* and the sugarcane cultivar  
270 R570 found that 83% of the genes are arranged co-linearly in the two genomes [13]. In our assembly of SP80-  
271 3280, 79,094 contigs had at least two predicted genes and could therefore be used to compare the order of  
272 genes in SP80-3280 to those of sorghum. To avoid the need to resolve multiple comparisons to duplicated  
273 regions in the sorghum genome, we generated a sequence similarity-based clustering of all coding sequences  
274 from both genomes and used the genes in clusters with only one sorghum gene as anchors to evaluate synteny  
(**Additional file 1: Fig. S8**). We found that 9,319 SP80-3280 contigs had at least two synteny anchors and  
276 85% (7,906) of these contigs were fully syntenic (**Additional file 1: Fig. S9A, B**), *i.e.* had all genes in the  
277 same order and orientation in SP80-3280 contigs and the sorghum chromosomes (**Additional file 2: Table**  
278 **S13**). To evaluate the effect of SP80-3280 assembly fragmentation on the distribution of contigs per syntenic  
279 block length, we sampled 10,000 contigs from SP80-3280 and 10,000 chromosome fragments from both R570  
280 and *S. spontaneum*, while preserving the overall distribution of contig lengths observed in SP80-3280. The  
281 distributions converged to similar shapes, with most contigs and chromosome fragments harboring a single  
282 syntenic block in all genomes (**Additional file 1: Fig. S9C**). While the number of syntenic blocks per contig  
283 were identical for the two cultivars, a larger frequency of fully syntenic contigs was observed for SP80-3280,  
284 suggesting that our assembly is enriched in genomic neighborhoods that are co-linear to sorghum, presumably  
285 comprising euchromatin. While an increase in sequencing coverage would lead to improved estimates of co-  
286 linearity, our results agree with widespread findings on the conservation of gene order among grass species  
287 and support the conclusion that, albeit fragmented, our assembly does not contain an excess of chromosomal  
288 rearrangements, as would be expected if there was a significant amount of chimeric contigs.

289 Finally, to allocate the gene space into potential physical groupings we aligned the SP80-3280  
290 transposable element (TE) masked BWA-SW to chromosome level assemblies of the *S. spontaneum* tetraploid  
291 AP85-441 genome [14] and the R570 [13] monoploid genome data. Multiple correspondence analysis (MCA)  
292 with hierarchical clustering of the sequences enabled us to allocate the gene space contigs into 6 clusters, an  
293 important contribution to future scaffolding efforts. From the total of 450,609 contig sequences, 418,471  
294 (92,86%) produced a BWA-SW alignment against the *S. spontaneum* [14] and R570 [13] assemblies (**Fig. 5A**)  
295 and protein alignment among these three species are consistent with MCA results (**Fig. 5B and C**). Contigs  
296 were also mapped against a collection of 778 targeted sequenced BACs of which 347 are from SP80-3280 and  
297 431 from R570. All BACs had a corresponding contig match against the assembly. This collection shows

298 centromeric regions and non-TE multigene families are the most covered (64x). An R gene locus (I2C-2) found  
299 in cluster 3 of SP80-3280 and in chromosome 9 of R570, was verified for co-location with a Ca<sup>+</sup>-dependent  
300 kinase, a *dog1* (delay of germination 1) and an aminotransferase. The co-location was confirmed in R570 and  
301 SP80-3280 BACs showing up to eight copies of each gene (**Additional file 1: Fig. S10**).

## 304 DISCUSSION

305 This assembly presents 373,869 genes. The gene space described here represents a significant step in  
306 understanding the haplotype origin of the hybrid genome. Approximately 12.25% of the SP80-3280 sequences  
307 are of *S. spontaneum* origin [14], supporting previous studies [10,11]. The comparison against different sets of  
308 genes (sorghum, CEGMA, BUSCO, mitochondrial and chloroplast) supported the comprehensiveness of the  
309 gene space. The total of predicted genes (373,869) is around 10x, 14x and 13x higher than those for monoploid  
310 genome assemblies of *S. spontaneum* [14], sugarcane R570 [13] and sorghum [48], respectively. This is in  
311 agreement with the predicted 8 to 14 copies for *S. spontaneum*, depending on the cytotypes, and for modern  
312 sugarcane varieties [49]. Genes that are single-copy in diploid grasses are present in up to 15 copies in the  
313 SP80-3280 assembly and the sequence differences are present mainly in the upstream regulatory region. This  
314 highlights the importance and complexity of studying homo(eo)logs expression in sugarcane and adds great  
315 value to the development of molecular markers for breeding in gene promoter regions. The differences in gene  
316 upstream sequences causes the differential expression among the copies and across the studied tissues. This  
317 was also reported for the polyploids cotton [50] and wheat [51]. Expression differences among homo(eo)logs  
318 in polyploid species may play a crucial role in increasing adaptability to environmental stresses (such as  
319 salinity [52], heat and drought [53]) and in improving performance of new cultivars. These differences  
320 highlight the importance of our assembly which discriminates homo(eo)logs, for example providing  
321 information important for the selection of target sequences (genes or promoters) to produce transgenic  
322 sugarcane plants. With the homo(eo)logs identified, one could discard a sequence that is not expressed or use  
323 genome editing tools to modify a target sequence to increase its expression. It is also possible to identify the  
324 progenitor contributing a homo(eo)log (e.g., *S. spontaneum*, *S. officinarum* or a parent in a cross) and select  
325 the homo(eo)log from the progenitor that has the phenotype of interest.



326 We also show how the data can be useful for gene promoter analysis. Expansion of SuSy genes might by  
327 selected for fiber development in cotton [54]. Different members of the SuSy gene family may have different  
2 functional roles and in sugarcane this was observed as different expression levels related to different TFBS  
328 identified. We identified five different top-ranked TFBS (with the highest score) in the ScSuSy1-5 members.  
4  
329 Three of them are related to auxin and abscisic-acid hormone signaling (ScSuSy1, 3, 5). For ScSuSy1 genes,  
7  
330 the TFBS analysis predicted the motif wATATATATw (MA1184.1) that is associated with RVE1, a morning-  
9  
331 phased transcription factor integrating the circadian clock and auxin pathway genes that bind to the evening  
11  
332 element (EE) of promoters [55]. For ScSuSy2 genes, we found the motif GACrAATryA (MA1374.1) that is  
13  
333 associated with IDD which regulates photoperiodic flowering by modulating sugar transport and metabolism  
15  
334 [56]. For ScSuSy3 genes, we found the AyACTAGTrT (MA0930.1) motif in 64% of its SP80-3280 copies and  
18  
335 in all copies in the *S. spontaneum* and R570 monoploid genomes. It is associated with ABA-responsive  
20  
336 elements (ABRE) that regulate stress response via ABA signaling. For ScSuSy4 genes, we found the  
22  
337 TAGyAynTTT (MA1012.1) motif that is probably involved in regulation of the photoperiod and vernalization  
24  
338 pathways. Finally, for ScSuSy5 genes, we found a CTGCTAGCAG (MA0564.1) conserved motif exclusively  
27  
339 for ScSuSy5 genes in SP80-3280. This motif allows binding with an element associated with ABI3, which  
29  
340 participates in abscisic acid (ABA)-regulated gene expression. Previous studies from our group had already  
31  
341 pointed out ABA- and sucrose-induced genes associated with higher sucrose content in sugarcane [57].  
33  
342

343 On the other hand, for ScPAL I genes, the TFBS analysis predicted an ArCAyATnTG (MA0930.1)  
38  
344 element, which is associated with ABF3, a transcription factor involved in ABA and stress responses and  
40  
345 acting as a positive component of glucose signal transduction. For ScPAL III genes, we found the element  
42  
346 GGTCsGGcKc (MA0992.1), an element associated with AP2/ERF, a transcription factor involved in the  
44  
347 regulation of gene expression by stress factors and by components of stress signal transduction pathways. For  
46  
348 ScPAL Va genes, we found the element TCTAAAGTTT (MA0064.1), which is associated with PBF, a  
48  
349 transcription factor involved in ABA, stress response and components of stress signal transduction pathways.  
50  
350 Finally, for ScPAL Vb genes, we found the motif GCCGGAACGG (MA1009.1). This element is associated  
52  
351 with ARF3, a transcription factor involved in auxin and ABA-regulated gene expression. In summary, our  
54  
352 results corroborates reported findings [57] which reveal that PAL genes were induced by ABA.  
56  
58  
59  
60  
61  
62  
63  
64  
65

353 Fewer TEs were identified in SP80-3280 in comparison to the two other published genome [13,14] and  
354 few cultivar specific amplifications were observed as all previously described TE families were identified.

355 Around 81% of the SNVs identified were bi-allelic with only 0,97% being tetra-allelic. The predominance  
356 of biallelic variations supports the theory that sugarcane experienced allotetraploidy shortly after divergence  
357 with sorghum ca. 3.8~4.6 MYA [58], creating two ‘subgenomes’. Further, autotetraploidization after  
358 *Saccharum* speciation ca. 3.1~3.8 MYA may have contributed to allelic richness within each sugarcane  
359 ‘subgenome’, with occasional exchanges between subgenomes likely. Recent published results from Vieira et  
360 al. [59], demonstrate that sugarcane meiotic chromosomes behave as bivalents, supporting these inferences.

361 In an attempt to organize the contigs, we allocate them in 6 clusters using MCA with hierarchical  
362 clustering of the sequences. MCA results suggest that 4 out of 6 clusters correspond to single chromosomes in  
363 *S. spontaneum* and R570. On the other hand, clusters 3 and 4, which contain multiple chromosomes, include  
364 those in which chromosomal rearrangement events were demonstrated in comparison to sorghum: SsChr5,  
365 SsChr6 and SsChr7 from *S. spontaneum* [14] and six R570 hom(oe)ology groups HG5-HG10 [13].

## 368 CONCLUSION

369 The singular challenge associated with sugarcane breeding makes genomic tools and genome assembly of  
370 a polyploid interspecific hybrid of especially high value. Its large autopolyploid genome, predominantly clonal  
371 propagation, and need for extensive phenotyping to determine breeding values, have contributed to the  
372 relatively slow (~1% per year at most) rate of progress in improvement of sugarcane [60] and perhaps other  
373 autopolyploids. The demonstration that most of its many homo(eo)logs are expressed, often with tissue-  
374 specificity, and that transcription factor binding sites and TE insertions differ among homo(eo)logs, suggests  
375 complex constraints that may necessitate unusual richness of information to make effective decisions about  
376 selecting some homo(eo)logs alleles at the expense of others in autopolyploid breeding populations. These  
377 principles may apply widely to many plants with large polyploid genomes that include many of those most  
378 efficient at converting solar radiation to biomass.

379 The present work discloses a large collection of gene-space homo(eo)logs diversity, taking advantage of  
380 novel sequencing technologies, adding over 3Gb of sequence not previously reported, in addition to genome

381 annotation, data mined homo(eo)logs, and explored regulatory regions. The resolved gene-space of the  
382 sugarcane genome is a fundamental step towards a high-quality chromosome resolved assembly from a current  
2 commercial hybrid. The genome sequence released for this interspecific polyploid supports its recent  
383 allotetraploid nature, reveals differences in promoter regions associated to differentially expressed genes and  
4  
384 transposable elements contributing to fine tuning of the rich diversity in a genome that is otherwise highly  
6  
385 syntenic with its close relative, sorghum.  
7  
386

11  
1387

13  
1388

15  
1389

## METHODS

17  
18  
1390

19  
20  
21  
22  
2391

### Plant material

24  
25  
26  
27  
28  
29  
30  
31  
32  
3392

Leaves from SP80-3280 were collected and frozen in liquid nitrogen. Genomic DNA was extracted using  
24 DNeasy Plant Mini Kit (Qiagen) following the standard protocol. DNA integrity was analyzed using the  
25 Agilent High Sensitivity DNA Analysis Kit (Agilent Technologies) and Agilent 2100 Bioanalyzer Instrument.  
26  
27  
28  
29  
30  
31  
32  
33  
34  
35  
36  
37  
38  
39  
40  
41  
42  
43  
44  
45  
46  
47  
48  
49  
50  
51  
52  
53  
54  
55  
56  
57  
58  
59  
60  
61  
62  
63  
64  
65

395 Quantification was done using Quant-it™ PicoGreen® dsDNA Assay Kit (ThermoFisher Scientific) and  
396 SpectraMax M2 microplate reader (Molecular Devices).

36  
37  
38  
39  
40  
41  
42  
43  
44  
45  
46  
47  
48  
49  
50  
51  
52  
53  
54  
55  
56  
57  
58  
59  
60  
61  
62  
63  
64  
65

### Sequencing Illumina Long-reads and Assembly

We used Illumina Synthetic Long-read sequencing technology, which provides very accurate long reads with  
40 a mean read length of roughly 5 kb, thus being able to represent polymorphisms across all copies of  
41 chromosomes. Genomic DNA was sheared into 5-10 kb fragments and diluted in 384-well plates. DNA  
42 fragments were ligated with PCR primers and specific sequences, which identify the 5' and 3' ends. The  
43 fragments were amplified, fragmented and barcoded to create 26 TruSeq Synthetic Long-Read DNA libraries.  
44  
45  
46  
47  
48  
49  
50  
51  
52  
53  
54  
55  
56  
57  
58  
59  
60  
61  
62  
63  
64  
65

404 The short fragments created in the second step of fragmentation were pooled and sequenced on the HiSeq  
405 instrument at the Illumina Service Genome Network. The reads from each of the 384 wells were pre-processed  
406 to correct sequencing and PCR errors. Contigs were produced from the paired-end information and further  
407 scaffolded together to resolve repeats and fill in gaps. More details on the informatics pipeline for short read  
408 scaffolding into long reads are available in the Fast Track Services Long Reads Pipeline User Guide [61].

409 To assemble sequences we used a two step approach: *i*) the Celera Assembler [62] (CA) was used for overlap  
410 computation and layout building; *ii*) the *tig-sense* module of the HBAR-DTK (Hierarchical-Based AssembleR  
2  
411 Development ToolKit) from Pacific Biosciences [63] was used to construct consensus sequences. This was  
4  
412 motivated by the fact that the CA, which uses the overlap-layout-consensus method, is more robust than *de*  
5  
6  
7  
413 *Bruijn* graph approaches. However, some adjustments needed to be made. CA, designed for Sanger reads, only  
9  
414 accepts quality scores between 0 and 40. Since synthetic long reads are very accurate and some of the base  
11  
415 qualities exceeded this upper bound, we modified the quality scores of our long-read data to allow them to be  
13  
416 appropriately parsed. The consensus module was also adapted for the analysis of big complex genomes. The  
14  
15  
16  
417 substantial number of contigs generated initially (roughly 450.000, half of them singletons) incurred in several  
17  
18  
418 files in a folder that hindered I/O operations. So, we *i*) modified *tig-sense* to automatically create subdirectories  
20  
21  
419 that contained not more than a thousand contig FastA files, reducing delays for file lookup; *ii*) divided contig  
22  
23  
420 processing into non-singletons and singletons, prioritizing non-singleton contigs; and *iii*) created a work  
24  
25  
421 history so that the program could be resumed after a halt. Overall, these modifications allowed us to reduce  
26  
27  
422 the running time of the consensus pipeline by one or two orders of magnitude.  
28  
29

## 30 31 32 33 **Sequencing BAC clones and assembly**

34  
425 A total of 780 independent BACs were sequenced using Roche454 and PACBio sequencing technologies.  
35  
36  
426 Each BAC clone was tagged with a unique barcode and sets of 12 BACs were pooled in one gasket. We  
37  
38  
427 assembled BACs individually as described [64] and obtained a total of 49.6 Mbp of assembled sequence, with  
39  
40  
41  
428 a mean length of 107 kbp. The BAC data includes 317 R570 BACs<sup>18</sup>, 116 additional R570 BACs and 347 from  
42  
43  
429 SP80-3280.  
44  
45

## 46 47 48 49 **Assembly Validation**

### 50 51 ***Comparison with Sugarcane BACs***

52  
433 Assembled contigs were aligned against a set of 780 BACs with BWA mem. Alignment data was processed  
53  
54  
55  
434 for coverage with the aid of Samtools (v1.1) and Bedtools (v2.25) and selected matches were at least 10 kbp  
56  
57  
435 long and covered 90% or more of the contig. Additionally, the unassembled synthetic long reads were aligned  
58  
59  
60  
61  
62  
63  
64  
65

436 to the same set of BACs, to check for discrepancies among contigs and long reads, which could be indicative  
437 of regions that were not assembled.

2  
438

4  
439

### ***Comparison with Sorghum CDS***

6  
7  
440

The set of 39,207 annotated sorghum coding sequences (CDS), release version v2.1, were downloaded from  
441 Phytozome [65]. These were aligned against the assembled contigs with BLASTn (v2.2.30+) using default  
442 parameters. For each sorghum CDS, we identified the longest fraction of the coding sequence contained within  
443 a single unitig. Only hits with at least 80% identity at the nucleotide level were considered for computing  
444 coverage.

16  
17  
18  
19  
445

20  
21  
2446

### ***Comparison with CEGMA***

22  
23  
2447

A total of 248 Ultra-conservative core eukaryotic genes classified by Korf Lab [22] were assessed in  
448 our sugarcane assembly with ‘-g’ and other default options of CEGMA v2.5.

25  
26  
27  
2449

29  
30  
3450

### ***Comparison with BUSCO***

31  
32  
3451

Assembly completeness was assessed by searching for the 1,440 core genes from the Plantae lineage of  
452 Benchmarking Universal Single-Copy Orthologs (BUSCO) [23]. BUSCO performs gene prediction and  
453 orthogonality assessment using Augustus [66] and HMMER3 [67]. Since these steps demand huge resources,  
454 we parted sugarcane contigs (4.3Gbp) into six groups with similar volume and processed BUSCO in parallel.  
455 After we merged results, we applied orthogonality assessment algorithm once again as thresholds that BUSCO  
456 exploits to discern actual single copy orthologs from paralogs.

45  
46  
4457

47  
48  
4458

### ***Comparison of the mitochondrial and chloroplast genomes***

49  
50  
4459

To reconstruct the SP80-3280 mitochondrial and chloroplast genomes, we have used as reference the complete  
460 genomes of *Saccharum* hybrid chloroplast (NC\_005878.2) [68] and the *Saccharum officinarum* mitochondrial  
461 chromosome 1 (LC107874.1) and chromosome 2 (LC107875.1) [25], downloaded from NCBI. The SP80-  
462 3280 genome contigs were aligned using BLASTN against their respective references and the best hits were  
463 selected based on cutoff E-value  $\leq 1.0E-15$ , with contig coverage  $\geq 90\%$  and identity  $\geq 70\%$ . The BLASTN

59  
60  
61  
62  
63  
64  
65

464 alignment results identified 2,482 and 909 contigs for the two mitochondrial chromosomes, respectively; and  
465 51,768 contigs for the chloroplast genome. To reconstruct the consensus sequences and do the genome  
2  
466 annotation we have used the CLC Genomics Workbench tools [69]. Using the CLC Tools and the Genome  
4  
467 Finishing Module, the selected contigs were aligned to their respective references and consensus sequences  
6  
468 extracted, filling the gaps with N's. The reconstructed consensus sequence aligned against the chloroplast  
7  
9 genome presented 100% of coverage and identity. Alignment against mitochondrial chromosomes 1 and 2  
10  
1470 presented over 99% of coverage and identity. The consensus sequences were annotated using their respective  
13  
1471 NCBI references with the CLC tool "Annotate from Reference", where all genes, tRNAs rRNAs and  
15  
1672 miscellaneous features were totally transferred.  
17

18  
1973

20

2174

## Genome Annotation

22

2375

### Gene prediction

24

2576

Contigs were annotated using a pipeline developed in house, previously used for BAC annotation.

26

2777

Transposable element (TE) discovery and masking was done using LTR harvest, LTR digest, CrossMatch

28

3078

against *Utricularia gibba* TE DB and RepeatMasking [70] of Viridiplantae [71] and previously known

31

3279

sugarcane TEs [45].

33

3480

Genes were discovered and annotated using masked contig sequences. *De novo* predictions were done with

35

3681

Augustus [66], Glimmer HMM [72], GeneMark HMM [73], SNAP and PASA [74] with rice models and

37

3882

sugarcane EST and RNAseq data. Alignments were also generated against reference protein DBs (sorghum,

39

4083

known sugarcane and Phytozome) using Exonerate [75] and BLAST [76] (v2.2.30+). Both *de novo* and

41

4284

alignment evidence were used for consensus annotation with EVIDENCEModeler [77] with greater weight given

43

4485

to experimental and alignment information. Functional assignment was derived from protein DB best hits and

45

4686

InterProScan 5 [78] results.

47

4887

49

50

5188

### GeneOntology annotation

52

5389

For functional annotation of predicted proteins from SP80-3280, all sequences were aligned to UniRef50

54

5590

clusters, a dataset of representative sequences clustering high similarity proteins from UniProtKB [30], using

56

5791

BLASTP (v2.2.30+, *-evalue 1e-5*). Sequences that fail to align in this first approach were also searched against

58

59

60

61

62

63

64

65

492 the RefSeq non-redundant protein database. Gene Ontology mapping and annotation of sequences with  
493 positive BLAST results was performed using Blast2Go framework [79].

2  
494  
4

#### 495 **Reference-guided RNAseq Assembly**

496 We used Trinity version 2.0.6 for reassembly of the Sugarcane ORFeome [29] using the genome as a reference,  
497 with a minimum contig length of 250 bp (genome\_guided\_max\_intron 3000, genome\_guided\_min\_coverage  
498 5, genome\_guided\_min\_reads\_per\_partition 10) to identify transcript models. SP80-3280 RNA-seq reads from  
499 3 tissues (leaves and immature and intermediate internodes) were used for alignment against the reference  
500 genome and partitioned into read clusters, which were then individually assembled using Trinity genome-  
501 guided methods. Trinity and genome-guided methods used a fixed k-mer size of 25nt. In this new assembly,  
502 269,050 genes and 275,807 transcripts were recovered. The quantity of transcripts recovered by the reference  
503 guided-assembly was higher, and thus closer to the number of predicted genes (374,774), than the *de novo*  
504 assembly.

25  
504  
26  
27  
505

#### 506 **Identification of Gene Copies and Count Estimation**

507 We downloaded the *Sorghum bicolor* genome assembly v2.1 from Phytozome and took 2,051 single copy  
508 genes according to Han *et al.* [80], which were also present as single copies in the genomes of *Oryza sativa*  
509 and *Brachypodium distachyon*. We aligned the coding sequences of these sorghum genes to the coding  
510 sequences of predicted sugarcane genes from the SP80-3280 assembly, using the BLASTn (v2.2.30+, -*evaluate*  
511 *le-6*). We filtered alignments with at least 80% nucleotide identity, covering at least 70% of both the sugarcane  
512 and sorghum sequences. For sorghum coding sequences with multiple hits to sugarcane genes, we further  
513 required that each hit had at least 80% identity, based on Wang *et al.* [46]. Sugarcane gene models aligned to  
514 the same single copy sorghum gene were denoted as putative homo(eo)logues. Finally, we counted the number  
515 of copies for each gene.

516 We clustered all gene copies based on each single copy sorghum gene to get estimates of sequence  
517 differentiation. We aligned the coding sequences for each pairwise combination in each gene cluster, using  
518 BLAT v35 [81] (*-minIdentity=0 -minScore=60*), disregarding clusters with more than 16 putative  
519 homo(eo)logs. Next, we parsed the alignments to obtain estimates of copy differentiation considering both

59  
60  
61  
62  
63  
64  
65

520 SNPs and INDELS. We gathered distance estimates from all pairs, from all clusters, to obtain dissimilarity  
521 distributions.

2  
522

4

## 523 **Gene copy characterization**

6

### 524 *Upstream region analysis*

7

525 We also assessed the dissimilarity levels of regions upstream (potential promoter regions) of the predicted  
526 sugarcane gene copies. We initially collected three different sequence ranges (100 bp, 500 bp and 1000 bp)  
527 upstream of the predicted gene start site. Next, we aligned these upstream sequences for each pairwise  
528 combination in each cluster, again using BLAT v35 [81] (*-minIdentity=0 -minScore=30*). Finally, for each  
529 distance range, we parsed the alignments and computed the dissimilarity level considering both mismatches  
530 and gaps. To avoid partial alignments of the upstream sequences, only alignments up to 20% shorter or longer  
531 than the expected sequence length were considered.

24  
25  
532

26

### 533 *Insertions and Deletions between gene copy Coding Sequences*

27

534 To investigate the occurrence of frameshift mutations between gene copies, we built multiple alignments of  
535 the coding sequences of putative copies, for each cluster, with MUSCLE v3.8.31 [83], using default  
536 parameters. We then computed the length distribution of insertions and deletions in the coding sequences, to  
537 differentiate between frame-preserving and frameshift indels. We parsed the CDS alignment for each pairwise  
538 combination of gene copies and counted the number of occurrences of gaps of a given length. We then pooled  
539 counts from all copy combinations to get a joint estimated distribution.

42  
43  
540

44

### 541 *Tissue-Specific Homo(eo)logs Expression Analysis*

45

542 We used RNA-Seq data [29] from leaves (*L*), immature (*II*) and intermediate (*I5*) internodes of SP80-3280 to  
543 find the expression of putative tissue-specific gene copies. These reads were initially aligned to the Sugarcane  
544 genome assembly using TopHat2 [84] version 2.0.9 (*library-type fr-firststrand*). We allowed reads to be  
545 aligned to up to 20 contigs of the genome assembly to identify alignments to different homo(eo)logs (*--max-*  
546 *multihits 20*) and supplied TopHat2 with the putative homo(eo)logs' annotation as a GTF file (*--GTF*  
547 *CDSMapping-homo(eo)logs.gtf*), in order to direct TopHat2 to align the reads to this transcriptome first.

59  
60

61

62

63

64

65



548 Besides the *TopHat2* alignment, we used the RSEM tool *rsem-calculate-expression* (version 1.2.31) to quantify  
549 the expression of predicted genes (*bowtie2*, *fragment-length-mean*, *fragment-length-sd* and *calc-ci*  
2 parameters). An in house perl script was used to estimate the mean length and standard deviation for each  
550 RNA-seq library. The main output of *TopHat2* BAM formatted file [85] *accepted\_hits.bam* was used with  
4  
551 *RSEM* to estimate the transcriptome expression profile. We developed in-house perl and R language (version  
7  
552 3.3.2) scripts to find the number of putative expressed homo(eo)logs for each single copy Sorghum gene, using  
9  
553 the information from *genome annotation* file (GFF format), showing the gene structure, the transcriptome  
11  
554 annotation and respective TPM (Transcript Per Million) abundance. The previous information allowed the  
13  
555 creation of the homo(eo)logs GFF file. We also applied TopHat2 to find the number of putative homo(eo)logs  
15  
556 expressed only in *antisense* orientation, using the same protocol described above, and the *antisense* reads of  
17  
557 RNA-Seq previously identified by Nishiyama *et al.* [29].  
18  
20  
21  
22

#### 560 **ScSuSy and ScPAL gene family analysis**

561 We used the sugarcane and sorghum SuSy protein sequences reported by Zhang *et al.* [35] as query for a  
27  
28  
29  
30  
31  
32  
33  
34  
562 tBLASTn (v2.2.30+) search in the predicted proteins from SP80-3280, *S. spontaneum* [46] and R570 genome  
35  
36  
37  
563 assemblies [13]. Putative SuSy genes were then filtered by query coverage  $\geq 80\%$  of at least one of the five  
38  
39  
564 ScSuSy from Zhang *et al.* [35] and by PFAM [86] domain search, considering only those containing both the  
40  
41  
42  
43  
44  
45  
46  
47  
48  
49  
50  
51  
52  
53  
54  
55  
56  
57  
58  
59  
60  
61  
62  
63  
64  
65  
conserved sucrose synthase and glucosyl-transferase 1 domains.

66 Based in BLAST and keyword search in two databases (Plant GDB, <http://www.plantgdb.org/> and Phytozome  
67 [65]) we found 8 different PAL genes in the sorghum genome, the same number previously reported [87]. For  
68 sugarcane, PAL genes were retrieved from an EST Cell Wall catalogue [41], which was used as query together  
69 with sorghum PAL genes for a BLASTn (v.2.2.30+) search to identify PAL genes in the predicted proteins  
70 from *S. spontaneum* [47] and R570 genome assemblies [13]. Putative PAL genes were then filtered by query  
71 coverage  $\geq 80\%$  of the sorghum PAL genes and by PFAM [86] domain search, considering only those  
72 containing the Aromatic amino acid lyase domain. Also, sequences not containing the PAL conserved amino  
73 acid motif Ala-Ser-Gly [88,89] and an essential Tyr110 [90] were excluded.

74 For both SuSy and PAL, nucleotide sequences (CDS) were aligned with *clustalw* [91] software in MEGA 7.0  
75 [92] and maximum likelihood trees were constructed with default parameters except for 1,000 bootstraps and

576 Gaps/missing data treatment “*use all sites*”. Expression heatmap was constructed using log<sub>2</sub> transcript per  
577 million (TPM) from previous RNA-seq data [29].

2  
578  
4

### 579 **Cell wall-related genes**

580 For the identification of cell wall-related genes in the sugarcane genome we used the Sugarcane SAS Cell Wall  
581 catalogue [41] as a reference. The search was carried out using tBLASTn (v2.2.30+, *-evaluate 1e-6*). These were  
582 manually re-annotated to produce a sugarcane cell wall catalogue with 3,054 sequences, classified in 10 cell  
583 wall categories.

14  
15  
16  
584  
17

### 585 **Transcription Factor analysis**

586 For the identification and classification of sugarcane predicted proteins into transcription factor (TF) families,  
587 we used the classification rules and tools described in GRASSIUS [44]. The search was carried out using  
588 HMMER v3.1b1 [93] and all significant HMM hits with *e*-value smaller than  $1e^{-3}$  were kept.

25  
26  
27  
28  
289  
29

### 590 **Promoter region analysis**

#### 591 *Transcription Start Site (TSS) and promoter region classification*

592 We evaluated promoter regions of genes associated with cell wall and sugar metabolism, ScPAL and ScSuSy,  
593 respectively, as described above. A total of 47 ScPAL and 44 ScSuSy was used. To extract the candidate  
594 promoter region, we selected, when available, up to 1500 nt upstream from the annotated start position of the  
595 gene, consisting of a core promoter (500 nt upstream of the start position) and proximal promoter (1000 nt  
596 upstream of the core promoter). Next, we used TSSPlant [94] to predict the TSS of the genes and the type of  
597 promoter (TATA-box, TATA-less). The software was set to report high score, sense only TSSs.

#### 598 *Transcription Factor Binding Site (TFBS) in silico characterization*

599 The annotation of TFBSs in the proximal promoter regions was performed in two steps: *de novo* prediction of  
600 TFBS motifs in smaller subsets of sequences and mapping the predicted TFBSs in the remaining promoter  
601 sequences. Sequences were partitioned in 10 subsets: five ScPAL groups and five ScSuSy groups. We then  
602 applied MEME [95] and MotifSampler [96], with default parameters, to each of these datasets to determine  
603 putative TFBS motifs. Both were restricted to search for at most 6 motifs with 10nt or less. MEME candidates

59  
60  
61  
62  
63  
64  
65

604 were a subset of MotifSampler's. MotifSampler ran for 100 cycles; following the manual we selected, from  
605 the 10 top-ranked motifs, the first 5 that occurred at least 10 times in the different cycles. Each of the resulting  
2  
606 35 candidate motifs was searched in the JASPAR public database [97], with partial positive matches for all of  
4  
607 them.

608 To evaluate the significance of the motifs we measured their frequency in promoter regions of each of the  
7  
9  
1609 original gene families and compared them with the frequency of each of these motifs in the promoter regions  
11  
1610 of the other SP80-3280 predicted genes. We also mapped the motifs of each ScSuSy and ScPAL gene family  
13  
1611 respectively in the promoter region of the ScSuSy and ScPAL genes from *S. spontaneum* and R570. Candidate  
15  
1612 motifs were mapped with MotifLocator [96]. For characterizing background sequences, we trained a first order  
17  
18  
1613 Markov chain [96] trained on SP80-3280 coding regions that were previously shuffled using the fasta-shuffle-  
20  
21  
1614 letters tool [95]. The parameters were set to full match of the motif in the target sequence and score 95% above  
22  
23  
1615 of the background.

### 2617 **Co-expression analysis**

2618 A field experiment was conducted at the Agricultural Sciences Center of the Federal University of São Carlos  
31  
32  
2619 in Araras (22°21'25''S and 47°23'3''W) in the state of Sao Paulo, Brazil. Trial plots of SP-3280 consisted of  
33  
34  
2620 four rows of 10 m long and spaced 1.35m apart. The field experiment was initiated in October 2012 and  
36  
37  
2621 extended up until November 2013, representing the conditions under which “one-year” sugarcane crops are  
38  
39  
2622 cultivated. Aiming to carry out observations throughout growth and development, tissue samples of the +1  
40  
41  
2623 leaves (L1) and upper (I1), immature (I5) and mature (I9) internodes were collected from two plots (two  
42  
43  
2624 technical replicates) after 4, 8, 11 and 13 months of planting.

45  
2625 RNA was extracted for four biological replicates, two from each plot, using the TriZol method, treated with  
47  
48  
2626 DNase I and purified. A pool of samples from leaves and a pool of internodes was used as a 'reference sample'  
49  
50  
2627 for hybridization experiments on a customized 4 × 44 K oligoarray (Agilent Technologies) for sugarcane  
51  
52  
2628 (CaneRegNet), conducted following the recommendations proposed by Lembke et al. [97]. The oligoarrays  
53  
54  
2629 were read using the GenePix 4000B scanner device (Molecular Devices) and the fluorescence data was  
56  
57  
2630 processed by Feature Extraction software 9.5.3 (Agilent Technologies).

631           Log2 transformed expression data was used for discovery and the analysis of co-expression modules,  
632 on CEMiTool R package [98]. The adjacency matrix was calculated by estimating the Spearman's correlation  
2  
633 coefficient between all pair of genes and raised to a soft thresholding power ( $\beta$ ) of 14. TopGO R package [99]  
4  
634 was used for gene ontology enrichment analysis for each module and node and edge files were generated for  
6  
635 use with the Cytoscape network visualization program [100].  
7  
8

### 9 10 11 12 **SNP variants (SNVs) analysis compared to genic regions in *Sorghum bicolor***

13  
14  
15 The 450,609 sugarcane contigs (183,322 singletons and 267,287 unitigs) were aligned to the sorghum genome  
16  
17 sequence [48] using the BWA MEM v0.7.10 [101] and reads with alignment score larger than 20 were used  
18  
19 for variant calling. SNVs were called using samtools v1.1 and bcftools v1.1 [85]. Using in-house python  
20  
21 scripts, extracted SNVs were screened when sugarcane contigs were located on the genic regions of the  
22  
23 sorghum genome and two or more sugarcane contigs were aligned to the same sorghum gene. Then, the number  
24  
25 of SNVs in each gene was counted according to four-base changes.  
26  
27 SNVs that are homozygous in sugarcane were extracted for further analysis. Large-effect SNVs were identified  
28  
29 as those mapped to coding regions, splicing sites, stop codons and transcription initiation sites.  
30  
31

### 32 33 34 **Functional Enrichment Test**

35  
36  
37 *Arabidopsis* GO-slim gene annotation was used for functional enrichment analysis. GO-slim terms were  
38  
39 assigned to sugarcane genes based on sequence similarity inferred from best BLASTp (v2.2.30+) hit. We used  
40  
41 a binomial distribution based on the proportion of a GO-slim term among all annotated genes in the sorghum  
42  
43 genome as the null distribution. The binomial test was used to assess functional enrichment, with a significance  
44  
45 threshold of  $p > 0.05$ .  
46  
47

### 48 49 50 **Conserved Synteny Blocks**

51  
52           DNA sequences for all CDSs from *S. spontaneum* [47], R570 [13], *Sorghum bicolor* [102] and SP80-  
53  
54 3280 were aligned using the BLASTn program. Results from BLAST searches, with e-value  $\leq 10^{-5}$ , were  
55  
56 parsed using an in-house Python script to filter alignments covering at least 70% of the length of both the query  
57  
58 and hit sequences. A second filter, requiring at least 80% identity was also applied and the resulting pairs of  
59  
60

659 queries and hit sequences were classified into putative orthologous groups using the union-find algorithm. We  
660 selected putative orthologous groups present in all three organisms but with only one *Sorghum* gene to be used  
2  
661 as markers to detect blocks of conserved gene order (syntenic blocks) in comparisons of SP80-3280 and *S.*  
4  
662 *spontaneum* against the genome of *S. bicolor*, thus avoiding the complications of a direct comparison of the  
6  
663 two polyploid genomes (**Additional file 1: Fig. S8**). Another Python script was used to detect the syntenic  
8  
664 blocks in both *Saccharum* genomes and to count the number of syntenic blocks in each contig.  
10

### 665 666 **Chromosome Synteny Multiple Correspondence Analysis with Clustering**

667 We performed a multiple correspondence analysis (MCA) with clustering of the best local alignment hit of  
17  
668 masked contigs. Input data were the 450,609 contigs of the sugarcane synthetic long read assembly and the  
19  
669 masked genomic sequences of *S. spontaneum* [47] and R570 [13]. We used the masked sugarcane contig  
22  
670 sequence produced by the annotation pipeline, excluding 69,879 sequences that were fully masked.  
24

671 The contigs were aligned to the grass genomes using BWA-SW v0.7.12-r1044 [101]. We used an in-house  
26  
672 Perl 5 script to retrieve the highest scoring hit for each contig and generate a table for input into R v3.2.1 [82].  
28  
673 This table contained the chromosome hit, if any, for each contig against each reference genome.  
31

674 We then used the FactoMineR R package v1.31.3 [103], along with the missMDA missing data handling  
33  
675 auxiliary package v1.8.2 [104]. We performed MCA with these data, *i.e.*, chromosome hit number information  
36  
676 for each contig was treated as a set of categorical variables and represented in the two principal component  
38  
677 dimensions. This was followed by hierarchical clustering in these two dimensions, as well as figure rendering,  
40  
678 using the Hierarchical Clustering on Principal Components (HCPC) function of FactoMineR.  
42

679 In order to identify the correspondence between *S. spontaneum* and R570 chromosomes and SP80-3280  
44  
680 clusters, protein sequence alignment between the cultivar variety and the ancestor and R570 was performed  
47  
681 with BlastP considering an e-value threshold of  $1e^{-5}$ . The best hit with a minimum query coverage of 90%  
49  
682 was selected for visual representation of the alignment results with Circos plot.  
51

### 683 684 685 **ADDITIONAL FILES**

686 **Additional file 1.doc contains Supplemental Figures S1 to S10**

687 **Additional file 2.xls contains Supplemental Tables S1 to S13**

688

2

689 **DECLARATIONS**

4

690

6

691 **List of abbreviations**

8

9

692

10

11

693 CEGMA: Core Eukaryotic Genes Mapping Approach

13

694 BUSCO: Benchmarking Universal Single-Copy Orthologs

15

695 ESTs: expressed sequence tags

17

18

696 CDS: coding sequences

19

20

697 SuSy: Sucrose Synthases

21

22

698 PAL: Phenylalanine ammonia-lyase

24

25

699 CCR: Cinnamoyl-CoA reductase

26

27

700 COMT: Caffeic acid 3-O-methyltransferase

28

29

701 4CL: 4-coumarate-CoA ligase

31

32

702 TFBSs: Transcription Factor Binding Sites

33

34

703 TE: transposable elements

35

36

704 MCA: Multiple correspondence analysis

37

38

705 I2C-2: R gene locus

39

40

706 *dog1*: (delay of germination 1

42

43

707 ABRE: ABA-responsive elements

44

45

708 ABA: abscisic acid

46

47

709

48

49

710 **Consent for publication:** Not applicable

51

52

711

53

54

712 **Availability of data and material**

55

56

713 Genomic data is publicly available at NCBI under GenBank Bioproject PRJNA431722. Contig sequence and

57

58

714 annotation are also available in a genome browser framework at <http://sucest-fun.org/>. The microarray data

60

61

62

63

64

65

715 have been deposited in NCBI's Gene Expression Omnibus and are accessible through GEO Series accession  
716 number GSE124990.

2  
717  
4

## 718 **Competing interests**

719 The authors declare that they have no competing interests.

9  
720

11  
721

## 721 **Funding**

13  
722

722 This work was funded by State of São Paulo Foundation and Microsoft Research (FAPESP grant n°  
15 2012/51062-3) and State of São Paulo Foundation (FAPESP grants n° 2014/50921-8, 2008/52146-0 and  
16 2008/52074-0) under the BIOEN Program. Additional funding included awards from the National Science  
17 2008/52074-0) under the BIOEN Program. Additional funding included awards from the National Science  
18 2008/52074-0) under the BIOEN Program. Additional funding included awards from the National Science  
19 2008/52074-0) under the BIOEN Program. Additional funding included awards from the National Science  
20 2008/52074-0) under the BIOEN Program. Additional funding included awards from the National Science  
21 2008/52074-0) under the BIOEN Program. Additional funding included awards from the National Science  
22 2008/52074-0) under the BIOEN Program. Additional funding included awards from the National Science  
23 2008/52074-0) under the BIOEN Program. Additional funding included awards from the National Science  
24 2008/52074-0) under the BIOEN Program. Additional funding included awards from the National Science  
25 2008/52074-0) under the BIOEN Program. Additional funding included awards from the National Science  
26 2008/52074-0) under the BIOEN Program. Additional funding included awards from the National Science  
27 2008/52074-0) under the BIOEN Program. Additional funding included awards from the National Science  
28 2008/52074-0) under the BIOEN Program. Additional funding included awards from the National Science  
29 2008/52074-0) under the BIOEN Program. Additional funding included awards from the National Science  
30 2008/52074-0) under the BIOEN Program. Additional funding included awards from the National Science  
31 2008/52074-0) under the BIOEN Program. Additional funding included awards from the National Science  
32 2008/52074-0) under the BIOEN Program. Additional funding included awards from the National Science  
33 2008/52074-0) under the BIOEN Program. Additional funding included awards from the National Science  
34 2008/52074-0) under the BIOEN Program. Additional funding included awards from the National Science  
35 2008/52074-0) under the BIOEN Program. Additional funding included awards from the National Science  
36 2008/52074-0) under the BIOEN Program. Additional funding included awards from the National Science  
37 2008/52074-0) under the BIOEN Program. Additional funding included awards from the National Science  
38 2008/52074-0) under the BIOEN Program. Additional funding included awards from the National Science  
39 2008/52074-0) under the BIOEN Program. Additional funding included awards from the National Science  
40 2008/52074-0) under the BIOEN Program. Additional funding included awards from the National Science  
41 2008/52074-0) under the BIOEN Program. Additional funding included awards from the National Science  
42 2008/52074-0) under the BIOEN Program. Additional funding included awards from the National Science  
43 2008/52074-0) under the BIOEN Program. Additional funding included awards from the National Science  
44 2008/52074-0) under the BIOEN Program. Additional funding included awards from the National Science  
45 2008/52074-0) under the BIOEN Program. Additional funding included awards from the National Science  
46 2008/52074-0) under the BIOEN Program. Additional funding included awards from the National Science  
47 2008/52074-0) under the BIOEN Program. Additional funding included awards from the National Science  
48 2008/52074-0) under the BIOEN Program. Additional funding included awards from the National Science  
49 2008/52074-0) under the BIOEN Program. Additional funding included awards from the National Science  
50 2008/52074-0) under the BIOEN Program. Additional funding included awards from the National Science  
51 2008/52074-0) under the BIOEN Program. Additional funding included awards from the National Science  
52 2008/52074-0) under the BIOEN Program. Additional funding included awards from the National Science  
53 2008/52074-0) under the BIOEN Program. Additional funding included awards from the National Science  
54 2008/52074-0) under the BIOEN Program. Additional funding included awards from the National Science  
55 2008/52074-0) under the BIOEN Program. Additional funding included awards from the National Science  
56 2008/52074-0) under the BIOEN Program. Additional funding included awards from the National Science  
57 2008/52074-0) under the BIOEN Program. Additional funding included awards from the National Science  
58 2008/52074-0) under the BIOEN Program. Additional funding included awards from the National Science  
59 2008/52074-0) under the BIOEN Program. Additional funding included awards from the National Science  
60 2008/52074-0) under the BIOEN Program. Additional funding included awards from the National Science  
61 2008/52074-0) under the BIOEN Program. Additional funding included awards from the National Science  
62 2008/52074-0) under the BIOEN Program. Additional funding included awards from the National Science  
63 2008/52074-0) under the BIOEN Program. Additional funding included awards from the National Science  
64 2008/52074-0) under the BIOEN Program. Additional funding included awards from the National Science  
65 2008/52074-0) under the BIOEN Program. Additional funding included awards from the National Science

15

16  
17

18  
19

20  
21

22  
23

24  
25

26  
27

28  
29

30  
31

32  
33

34  
35

36  
37

38  
39

40  
41

42  
43

44  
45

46  
47

48  
49

## 50 **Authors' contributions**

51

52 Project leaders: GMS, MAVS and DH;

53

54 Sample collection and DNA extraction: CGL;

55

56 Genome sequencing and assembly: HL, MCS, GRAM, RP and BD;

57

58 Genome assembly supervision: DH;

59

60 Genome annotation: MAVS, GJW, MYNJ and FTC;

61

62  
63  
64  
65

744 Saccharum spontaneum genome assembly: JZ, XZ, QZ and RM;  
745 BWA-SW analysis: GJW;  
2  
746 BAC sequencing and assembly: MAVS, GJW, GTR, HB and SV;  
4  
747 Synteny analysis: AMD, RFS and GGS;  
6  
748 Reference-guided RNAseq Assembly: MYNJ;  
8  
9  
749 Tissue-Specific Allelic Expression Analysis: MYNJ, CGL and PMA;  
10  
11  
750 Phylogeny analysis: SSF and ALD;  
13  
751 SP80-3280 growth and maturation experiment: MSC, GMS, CGL and ALD  
15  
752 Co-expression analysis: ALD  
17  
18  
753 Regulatory region analysis (TE and TFBS): MAVS, MMO, AMD, GMS, CTH and ALD;  
19  
20  
754 SNP variants (SNVs) analysis: CK, HG and AP;  
22  
755 Organization and management of the author's contributions: CGL, ALD, GMS and MAVS;  
24  
756 Data availability (NCBI and Sucest-fun): FTC;  
26  
757 All authors have read and approved the final version of the manuscript.  
28  
29

30

31

## 32 **Acknowledgements**

33

34 We are indebted to Andreia Prata, Vania Sedano, Nathalia de Setta, Joni Lima, Marcos Buckeridge, Eveline

35

36 Tavares, Katia Scortecci, Anete Pereira de Souza, Sonia Vautrin and Hélène Bergès for contributions in BAC

37

38 library construction, BAC selection or sequencing. We are indebted to the Sugarcane Genome Sequencing

39

40 Initiative for useful discussions.

42

43

44

## 45 **REFERENCES**

46

47

48 1. FAOSTAT. Production/Crops, Food and Agriculture Organization of the United Nations - Statistics Division  
49 [Internet]. 2018. Available from: <http://www.fao.org/faostat/en/#home>

50

51 2. Long SP, Karp A, Buckeridge SC, Davis SC, Jaiswal D, Moore PH, et al. Feedstocks for biofuels and bioenergy.  
52 Bioenergy Sustain Bridg Gaps [Internet]. Paris Cedex: Scientific Committee on Problems of the Environment  
53 (SCOPE); 2015. p. 302–347. Available from: [http://bioenfapesp.org/scopebioenergy/images/chapters/bioen-scope\\_chapter10.pdf](http://bioenfapesp.org/scopebioenergy/images/chapters/bioen-scope_chapter10.pdf)

54

55 3. Kline KL, Msangi S, Dale VH, Woods J, Souza GM, Osseweijer P, et al. Reconciling food security and  
56 bioenergy: priorities for action. GCB Bioenergy. 2017;9:557–76.

57

58 4. Goldemberg J. Ethanol for a Sustainable Energy Future. Science. 2007;315:808–10.

59

60

61

62

63

64

65



- 776 5. Jaiswal D, De Souza AP, Larsen S, LeBauer DS, Miguez FE, Sparovek G, et al. Brazilian sugarcane ethanol as  
777 an expandable green alternative to crude oil use. *Nat Clim Change*. 2017;7:788–92.
- 1  
778 6. Souza GM, Ballester MVR, de Brito Cruz CH, Chum H, Dale B, Dale VH, et al. The role of bioenergy in a  
779 climate-changing world. *Environ Dev*. 2017;23:57–64.
- 4  
780 7. Souza GM, Victoria RL, Joly CA, Verdade LM. *Bioenergy & sustainability: bridging the gaps*. Paris Cedex:  
781 Scientific Committee on Problems of the Environment (SCOPE); 2015.
- 8  
782 8. Souza GM, Filho RM. *Industrial Biotechnology and Biomass: What Next for Brazil’s Future Energy and  
783 Chemicals?* *Ind Biotechnol*. 2016;12:24–5.
- 11  
784 9. Vilela M de M, Del-Bem L-E, Van Sluys M-A, de Setta N, Kitajima JP, Cruz GMQ, et al. Analysis of three  
785 sugarcane homo/homeologous regions suggests independent polyploidization events of *Saccharum  
786 officinarum* and *Saccharum spontaneum*. *Genome Biol Evol*. 2017;evw293.
- 16  
787 10. Jannoo N, Grivet L, Seguin M, Paulet F, Domaingue R, Rao PS, et al. Molecular investigation of the genetic  
788 base of sugarcane cultivars. *Theor Appl Genet*. 1999;99:171–84.
- 19  
789 11. D’Hont A. Unraveling the genome structure of polyploids using FISH and GISH; examples of sugarcane  
790 and banana. *Cytogenet Genome Res*. 2005;109:27–33.
- 22  
791 12. Thirugnanasambandam PP, Hoang NV, Henry RJ. The Challenge of Analyzing the Sugarcane Genome.  
792 *Front Plant Sci* [Internet]. 2018 [cited 2018 Aug 23];9. Available from:  
793 <http://journal.frontiersin.org/article/10.3389/fpls.2018.00616/full>
- 27  
794 13. Garsmeur O, Droc G, Antonise R, Grimwood J, Potier B, Aitken K, et al. A mosaic monoploid reference  
795 sequence for the highly complex genome of sugarcane. *Nat Commun* [Internet]. 2018 [cited 2018 Aug 16];9.  
796 Available from: <http://www.nature.com/articles/s41467-018-05051-5>
- 32  
797 14. Zhang J, Zhang X, Tang H, Zhang Q, Hua X, Ma X, et al. Allele-defined genome of the autopolyploid  
798 sugarcane *Saccharum spontaneum* L. *Nat Genet*. 2018;50:1565–73.
- 35  
799 15. Waclawovsky AJ, Sato PM, Lembke CG, Moore PH, Souza GM. Sugarcane for bioenergy production: an  
800 assessment of yield and regulation of sucrose content. *Plant Biotechnol J*. 2010;8:263–76.
- 39  
801 16. Goldemberg J, Coelho ST, Guardabassi P. The sustainability of ethanol production from sugarcane. *Energy  
802 Policy*. 2008;36:2086–97.
- 42  
803 17. Welbaum GE, Meinzer FC. Compartmentation of solutes and water in developing sugarcane stalk tissue.  
804 *Plant Physiol*. 1990;93:1147–53.
- 45  
805 18. Bonawitz ND, Chapple C. The genetics of lignin biosynthesis: connecting genotype to phenotype. *Annu  
806 Rev Genet*. 2010/09/03. 2010;44:337–63.
- 49  
807 19. Himmel ME, Ding SY, Johnson DK, Adney WS, Nimlos MR, Brady JW, et al. Biomass recalcitrance:  
808 engineering plants and enzymes for biofuels production. *Science*. 2007/02/10. 2007;315:804–7.
- 52  
809 20. Vettore AL. Analysis and Functional Annotation of an Expressed Sequence Tag Collection for Tropical Crop  
810 Sugarcane. *Genome Res*. 2003;13:2725–35.
- 56  
811 21. Riaño-Pachón DM, Mattiello L. Draft genome sequencing of the sugarcane hybrid SP80-3280.  
812 *F1000Research*. 2017;6:861.

- 813 22. Parra G, Bradnam K, Korf I. CEGMA: a pipeline to accurately annotate core genes in eukaryotic genomes.  
814 Bioinformatics. 2007;23:1061–7.
- 1  
815 23. Simão FA, Waterhouse RM, Ioannidis P, Kriventseva EV, Zdobnov EM. BUSCO: assessing genome assembly  
816 and annotation completeness with single-copy orthologs. Bioinformatics. 2015;31:3210–2.
- 4  
817 24. Calsa Júnior T, Carraro DM, Benatti MR, Barbosa AC, Kitajima JP, Carrer H. Structural features and  
818 transcript-editing analysis of sugarcane (*Saccharum officinarum* L.) chloroplast genome. Curr Genet.  
819 2004;46:366–73.
- 9  
820 25. Tsuruta S, Ebina M, Kobayashi M, Takahashi W. Complete Chloroplast Genomes of *Erianthus*  
821 *arundinaceus* and *Miscanthus sinensis*: Comparative Genomics and Evolution of the *Saccharum* Complex.  
822 Heinze B, editor. PLOS ONE. 2017;12:e0169992.
- 13  
823 26. Nah G, Im J-H, Lim S-H, Kim K, Choi AY, Yook MJ, et al. Complete chloroplast genomes of two *Miscanthus*  
824 species. Mitochondrial DNA Part A. 2016;27:4359–60.
- 17  
825 27. Cardoso-Silva CB, Costa EA, Mancini MC, Balsalobre TWA, Canesin LEC, Pinto LR, et al. De Novo Assembly  
826 and Transcriptome Analysis of Contrasting Sugarcane Varieties. Gibas C, editor. PLoS ONE. 2014;9:e88462.
- 20  
827 28. Vicentini R, Bottcher A, Brito M dos S, dos Santos AB, Creste S, Landell MG de A, et al. Large-Scale  
828 Transcriptome Analysis of Two Sugarcane Genotypes Contrasting for Lignin Content. Amancio S, editor. PLOS  
829 ONE. 2015;10:e0134909.
- 25  
830 29. Nishiyama MY, Ferreira SS, Tang P-Z, Becker S, Pörtner-Taliana A, Souza GM. Full-Length Enriched cDNA  
831 Libraries and ORFeome Analysis of Sugarcane Hybrid and Ancestor Genotypes. PLOS ONE. 2014;9:e107351.
- 28  
832 30. Suzek BE, Wang Y, Huang H, McGarvey PB, Wu CH, the UniProt Consortium. UniRef clusters: a  
833 comprehensive and scalable alternative for improving sequence similarity searches. Bioinformatics.  
834 2015;31:926–32.
- 33  
835 31. Ashburner M, Ball CA, Blake JA, Botstein D, Butler H, Cherry JM, et al. Gene Ontology: tool for the  
836 unification of biology. Nat Genet. 2000;25:25–9.
- 36  
837 32. Veeckman E, Ruttink T, Vandepoele K. Are We There Yet? Reliably Estimating the Completeness of Plant  
838 Genome Sequences. Plant Cell. 2016;28:1759–68.
- 40  
839 33. Nelson JC, Wang S, Wu Y, Li X, Antony G, White FF, et al. Single-nucleotide polymorphism discovery by  
840 high-throughput sequencing in sorghum. BMC Genomics [Internet]. 2011 [cited 2018 Jan 26];12. Available  
841 from: <http://bmcgenomics.biomedcentral.com/articles/10.1186/1471-2164-12-352>
- 44  
842 34. Coleman HD, Yan J, Mansfield SD. Sucrose synthase affects carbon partitioning to increase cellulose  
843 production and altered cell wall ultrastructure. Proc Natl Acad Sci. 2009;106:13118–23.
- 48  
844 35. Zhang J, Arro J, Chen Y, Ming R. Haplotype analysis of sucrose synthase gene family in three  
845 *Saccharum* species. BMC Genomics. 2013;14:314.
- 51  
846 36. Persia D, Cai G, Del Casino C, Faleri C, Willemse MT, Cresti M. Sucrose synthase is associated with the cell  
847 wall of tobacco pollen tubes. Plant Physiol. 2008;147:1603–18.
- 55  
848 37. Brill E, van Thournout M, White RG, Llewellyn D, Campbell PM, Engelen S, et al. A Novel Isoform of Sucrose  
849 Synthase Is Targeted to the Cell Wall during Secondary Cell Wall Synthesis in Cotton Fiber. Plant Physiol.  
850 2011;157:40–54.

- 851 38. Sewalt V, Ni W, Blount JW, Jung HG, Masoud SA, Howles PA, et al. Reduced Lignin Content and Altered  
852 Lignin Composition in Transgenic Tobacco Down-Regulated in Expression of L-Phenylalanine Ammonia-Lyase  
853 or Cinnamate 4-Hydroxylase. *Plant Physiol.* 1997;115:41–50.  
2
- 854 39. Rohde A. Molecular Phenotyping of the *pal1* and *pal2* Mutants of *Arabidopsis thaliana* Reveals Far-  
855 Reaching Consequences on Phenylpropanoid, Amino Acid, and Carbohydrate Metabolism. *PLANT CELL*  
856 *ONLINE.* 2004;16:2749–71.  
4  
5  
6
- 857 40. Vanholme R, Storme V, Vanholme B, Sundin L, Christensen JH, Goeminne G, et al. A Systems Biology View  
858 of Responses to Lignin Biosynthesis Perturbations in *Arabidopsis*. *Plant Cell.* 2012;24:3506–29.  
7
- 859 41. Ferreira SS, Hotta CT, Poelking VG de C, Leite DCC, Buckeridge MS, Loureiro ME, et al. Co-expression  
860 network analysis reveals transcription factors associated to cell wall biosynthesis in sugarcane. *Plant Mol Biol.*  
861 2016;91:15–35.  
10  
11  
12  
13  
14
- 862 42. Cunha CP, Roberto GG, Vicentini R, Lembke CG, Souza GM, Ribeiro RV, et al. Ethylene-induced  
863 transcriptional and hormonal responses at the onset of sugarcane ripening. *Sci Rep [Internet].* 2017 [cited  
864 2018 Aug 16];7. Available from: <http://www.nature.com/articles/srep43364>  
15  
16  
17  
18  
19
- 865 43. Xu Z, Zhang D, Hu J, Zhou X, Ye X, Reichel KL, et al. Comparative genome analysis of lignin biosynthesis  
866 gene families across the plant kingdom. *BMC Bioinformatics.* 2009;10:S3.  
20  
21  
22
- 867 44. Yilmaz A, Nishiyama MY, Fuentes BG, Souza GM, Janies D, Gray J, et al. GRASSIUS: A Platform for  
868 Comparative Regulatory Genomics across the Grasses. *PLANT Physiol.* 2009;149:171–80.  
23  
24  
25  
26
- 869 45. Domingues DS, Cruz GM, Metcalfe CJ, Nogueira FT, Vicentini R, de S Alves C, et al. Analysis of plant LTR-  
870 retrotransposons at the fine-scale family level reveals individual molecular patterns. *BMC Genomics.*  
871 2012;13:137.  
27  
28  
29  
30
- 872 46. Wang J, Roe B, Macmil S, Yu Q, Murray JE, Tang H, et al. Microcollinearity between autopolyploid  
873 sugarcane and diploid sorghum genomes. *BMC Genomics.* 2010;11:261.  
31  
32  
33  
34
- 874 47. Zhang et al. Allele-defined genome of the autopolyploid sugarcane *Saccharum spontaneum* L. *Accept Nat*  
875 *Genet.* 2018;  
35  
36  
37
- 876 48. Paterson AH, Bowers JE, Bruggmann R, Dubchak I, Grimwood J, Gundlach H, et al. The *Sorghum bicolor*  
877 genome and the diversification of grasses. *Nature.* 2009;457:551–6.  
38  
39  
40  
41
- 878 49. D’Hont A, Ison D, Alix K, Roux C, Glaszmann JC. Determination of basic chromosome numbers in the genus  
879 *Saccharum* by physical mapping of ribosomal RNA genes. *Genome.* 1998;41:221–5.  
42  
43  
44
- 880 50. Liu Z, Adams KL. Expression Partitioning between Genes Duplicated by Polyploidy under Abiotic Stress  
881 and during Organ Development. *Curr Biol.* 2007;17:1669–74.  
45  
46  
47  
48
- 882 51. Ramírez-González RH, Borrill P, Lang D, Harrington SA, Brinton J, Venturini L, et al. The transcriptional  
883 landscape of polyploid wheat. *Science.* 2018;361:ear6089.  
49  
50  
51
- 884 52. Zhang Y, Liu Z, Khan AA, Lin Q, Han Y, Mu P, et al. Expression partitioning of homeologs and tandem  
885 duplications contribute to salt tolerance in wheat (*Triticum aestivum* L.). *Sci Rep [Internet].* 2016 [cited 2018  
886 Aug 16];6. Available from: <http://www.nature.com/articles/srep21476>  
52  
53  
54  
55  
56
- 887 53. Liu Z, Xin M, Qin J, Peng H, Ni Z, Yao Y, et al. Temporal transcriptome profiling reveals expression  
888 partitioning of homeologous genes contributing to heat and drought acclimation in wheat (*Triticum aestivum*  
889 L.). *BMC Plant Biol [Internet].* 2015 [cited 2018 Aug 16];15. Available from:  
890 <http://www.biomedcentral.com/1471-2229/15/152>  
57  
58  
59  
60  
61  
62  
63  
64  
65

- 891 54. Zou C, Lu C, Shang H, Jing X, Cheng H, Zhang Y, et al. Genome-Wide Analysis of the *Sus* Gene Family in  
892 Cotton: Comprehensive Analysis of Cotton *Sus* Genes. *J Integr Plant Biol.* 2013;55:643–53.
- 1  
893 55. Rawat R, Schwartz J, Jones MA, Sairanen I, Cheng Y, Andersson CR, et al. REVEILLE1, a Myb-like  
894 transcription factor, integrates the circadian clock and auxin pathways. *Proc Natl Acad Sci.* 2009;106:16883–  
895 8.
- 6  
896 56. Seo PJ, Ryu J, Kang SK, Park C-M. Modulation of sugar metabolism by an INDETERMINATE DOMAIN  
897 transcription factor contributes to photoperiodic flowering in Arabidopsis: Sugar and photoperiodic  
898 flowering. *Plant J.* 2011;65:418–29.
- 10  
899 57. Papini-Terzi FS, Rocha FR, Vêncio RZ, Felix JM, Branco DS, Waclawovsky AJ, et al. Sugarcane genes  
900 associated with sucrose content. *BMC Genomics.* 2009;10:120.
- 14  
901 58. Kim C, Wang X, Lee T-H, Jakob K, Lee G-J, Paterson AH. Comparative Analysis of Miscanthus and  
902 Saccharum Reveals a Shared Whole-Genome Duplication but Different Evolutionary Fates. *Plant Cell.*  
903 2014;26:2420–9.
- 18  
904 59. Vieira MLC, Almeida CB, Oliveira CA, Tacuatiá LO, Munhoz CF, Cauz-Santos LA, et al. Revisiting Meiosis in  
905 Sugarcane: Chromosomal Irregularities and the Prevalence of Bivalent Configurations. *Front Genet* [Internet].  
906 2018 [cited 2018 Aug 27];9. Available from:  
907 <https://www.frontiersin.org/article/10.3389/fgene.2018.00213/full>
- 24  
908 60. Dal-Bianco M, Carneiro MS, Hotta CT, Chapola RG, Hoffmann HP, Garcia AAF, et al. Sugarcane  
909 improvement: how far can we go? *Curr Opin Biotechnol.* 2012;23:265–70.
- 28  
910 61. Illumina. FastTrack Services Long Reads Pipeline User Guide. 2013.
- 30  
911 62. Myers EW. A Whole-Genome Assembly of *Drosophila*. *Science.* 2000;287:2196–204.
- 32  
912 63. Chin C-S, Alexander DH, Marks P, Klammer AA, Drake J, Heiner C, et al. Nonhybrid, finished microbial  
913 genome assemblies from long-read SMRT sequencing data. *Nat Methods.* 2013;10:563–9.
- 35  
914 64. de Setta N, Monteiro-Vitorello CB, Metcalfe CJ, Cruz GMQ, Del Bem LE, Vicentini R, et al. Building the  
915 sugarcane genome for biotechnology and identifying evolutionary trends. *BMC Genomics.* 2014;15:540.
- 39  
916 65. Goodstein DM, Shu S, Howson R, Neupane R, Hayes RD, Fazo J, et al. Phytosome: a comparative platform  
917 for green plant genomics. *Nucleic Acids Res.* 2012;40:D1178–86.
- 42  
918 66. Keller O, Kollmar M, Stanke M, Waack S. A novel hybrid gene prediction method employing protein  
919 multiple sequence alignments. *Bioinforma Oxf Engl.* 2011;27:757–63.
- 45  
920 67. Eddy SR. Accelerated Profile HMM Searches. Pearson WR, editor. *PLoS Comput Biol.* 2011;7:e1002195.
- 48  
921 68. Shearman JR, Sonthirod C, Naktang C, Pootakham W, Yoocha T, Sangsrakru D, et al. The two chromosomes  
922 of the mitochondrial genome of a sugarcane cultivar: assembly and recombination analysis using long PacBio  
923 reads. *Sci Rep* [Internet]. 2016 [cited 2018 Jan 24];6. Available from:  
924 <http://www.nature.com/articles/srep31533>
- 53  
925 69. Knudsen T, Knudsen B. CLC Genomics Benchwork 6 [Internet]. 2013. Available from:  
926 <http://www.clcbio.com>
- 57  
927 70. Smit A, Hubley R, Green P. RepeatMasker Open-4.0 [Internet]. Available from:  
928 <http://www.repeatmasker.org>
- 60  
61  
62  
63  
64  
65

- 929 71. Jurka J, Kapitonov VV, Pavlicek A, Klonowski P, Kohany O, Walichiewicz J. Repbase Update, a database of  
930 eukaryotic repetitive elements. *Cytogenet Genome Res.* 2005;110:462–7.
- 1  
931 72. Majoros WH, Pertea M, Salzberg SL. TigrScan and GlimmerHMM: two open source ab initio eukaryotic  
932 gene-finders. *Bioinforma Oxf Engl.* 2004;20:2878–9.
- 4  
933 73. Besemer J, Borodovsky M. GeneMark: web software for gene finding in prokaryotes, eukaryotes and  
934 viruses. *Nucleic Acids Res.* 2005;33:W451–4.
- 8  
935 74. Haas BJ, Delcher AL, Mount SM, Wortman JR, Smith Jr RK, Hannick LI, et al. Improving the Arabidopsis  
936 genome annotation using maximal transcript alignment assemblies. *Nucleic Acids Res.* 2003;31:5654–66.
- 11  
937 75. Slater GSC, Birney E. Automated generation of heuristics for biological sequence comparison. *BMC*  
938 *Bioinformatics.* 2005;6:31.
- 13  
939 76. Camacho C, Coulouris G, Avagyan V, Ma N, Papadopoulos J, Bealer K, et al. BLAST+: architecture and  
940 applications. *BMC Bioinformatics.* 2009;10:421.
- 18  
941 77. Haas BJ, Salzberg SL, Zhu W, Pertea M, Allen JE, Orvis J, et al. Automated eukaryotic gene structure  
942 annotation using EVIDENCEModeler and the Program to Assemble Spliced Alignments. *Genome Biol.*  
943 2008;9:R7.
- 22  
944 78. Jones P, Binns D, Chang H-Y, Fraser M, Li W, McAnulla C, et al. InterProScan 5: genome-scale protein  
945 function classification. *Bioinformatics.* 2014;30:1236–40.
- 26  
946 79. Conesa A, Gotz S, Garcia-Gomez JM, Terol J, Talon M, Robles M. Blast2GO: a universal tool for annotation,  
947 visualization and analysis in functional genomics research. *Bioinformatics.* 2005;21:3674–6.
- 29  
948 80. Han F, Peng Y, Xu L, Xiao P. Identification, characterization, and utilization of single copy genes in 29  
949 angiosperm genomes. *BMC Genomics.* 2014;15:504.
- 33  
950 81. Kent WJ. BLAT--the BLAST-like alignment tool. *Genome Res.* 2002;12:656–64.
- 35  
951 82. R Core Team. R: A Language and Environment for Statistical Computing [Internet]. Vienna, Austria; 2014.  
952 Available from: <http://www.R-project.org>
- 38  
953 83. Edgar RC. MUSCLE: multiple sequence alignment with high accuracy and high throughput. *Nucleic Acids*  
954 *Res.* 2004;32:1792–7.
- 42  
955 84. Kim D, Pertea G, Trapnell C, Pimentel H, Kelley R, Salzberg SL. TopHat2: accurate alignment of  
956 transcriptomes in the presence of insertions, deletions and gene fusions. *Genome Biol.* 2013;14:R36.
- 45  
957 85. Li H, Handsaker B, Wysoker A, Fennell T, Ruan J, Homer N, et al. The Sequence Alignment/Map format  
958 and SAMtools. *Bioinforma Oxf Engl.* 2009;25:2078–9.
- 49  
959 86. Finn RD, Coghill P, Eberhardt RY, Eddy SR, Mistry J, Mitchell AL, et al. The Pfam protein families database:  
960 towards a more sustainable future. *Nucleic Acids Res.* 2016;44:D279–85.
- 52  
961 87. Xu Z, Zhang D, Hu J, Zhou X, Ye X, Reichel KL, et al. Comparative genome analysis of lignin biosynthesis  
962 gene families across the plant kingdom. *BMC Bioinformatics.* 2009;10 Suppl 1:S3.
- 55  
963 88. Röther D, Poppe L, Morlock G, Viergutz S, Rétey J. An active site homology model of phenylalanine  
964 ammonia-lyase from *P. crispum*. *Eur J Biochem.* 2002;269:3065–75.

- 965 89. Calabrese JC, Jordan DB, Boodhoo A, Sariaslani S, Vannelli T. Crystal structure of phenylalanine ammonia  
966 lyase: Multiple helix dipoles implicated in catalysis. *Biochemistry*. 2004;43:11403–16.
- 1  
967 90. Pilbák S, Tomin A, Rétey J, Poppe L. The essential tyrosine-containing loop conformation and the role of  
968 the C-terminal multi-helix region in eukaryotic phenylalanine ammonia-lyases. *FEBS J*. 2006;273:1004–19.
- 4  
969 91. Thompson JD, Higgins DG, Gibson TJ. CLUSTAL W: improving the sensitivity of progressive multiple  
970 sequence alignment through sequence weighting, position-specific gap penalties and weight matrix choice.  
971 *Nucleic Acids Res*. 1994;22:4673–80.
- 9  
972 92. Kumar S, Stecher G, Tamura K. MEGA7: Molecular Evolutionary Genetics Analysis Version 7.0 for Bigger  
973 Datasets. *Mol Biol Evol*. 2016;33:1870–4.
- 12  
974 93. Zhang Z, Wood WI. A profile hidden Markov model for signal peptides generated by HMMER. *Bioinforma*  
975 *Oxf Engl*. 2003;19:307–8.
- 16  
976 94. Shahmuradov IA, Umarov RK, Solovyev VV. TSSPlant: a new tool for prediction of plant Pol II promoters.  
977 *Nucleic Acids Res*. 2017;gkw1353.
- 19  
978 95. Bailey TL, Boden M, Buske FA, Frith M, Grant CE, Clementi L, et al. MEME Suite: tools for motif discovery  
979 and searching. *Nucleic Acids Res*. 2009;37:W202–8.
- 22  
980 96. Claeys M, Storms V, Sun H, Michoel T, Marchal K. MotifSuite: workflow for probabilistic motif detection  
981 and assessment. *Bioinformatics*. 2012;28:1931–2.
- 26  
982 97. Khan A, Fornes O, Stigliani A, Gheorghe M, Castro-Mondragon JA, van der Lee R, et al. JASPAR 2018:  
983 update of the open-access database of transcription factor binding profiles and its web framework. *Nucleic*  
984 *Acids Res*. 2018;46:D260–6.
- 30  
985 98. Russo PST, Ferreira GR, Cardozo LE, Bürger MC, Arias-Carrasco R, Maruyama SR, et al. CEMiTool: a  
986 Bioconductor package for performing comprehensive modular co-expression analyses. *BMC Bioinformatics*  
987 [Internet]. 2018 [cited 2018 Aug 16];19. Available from:  
988 <https://bmcbioinformatics.biomedcentral.com/articles/10.1186/s12859-018-2053-1>
- 36  
989 99. Alexa A, Rahnenfuhrer J. topGO: Enrichment Analysis for Gene Ontology.
- 39  
990 100. Shannon P. Cytoscape: A Software Environment for Integrated Models of Biomolecular Interaction  
991 Networks. *Genome Res*. 2003;13:2498–504.
- 42  
992 101. Li H, Durbin R. Fast and accurate long-read alignment with Burrows-Wheeler transform. *Bioinforma Oxf*  
993 *Engl*. 2010;26:589–95.
- 45  
994 102. McCormick RF, Truong SK, Sreedasyam A, Jenkins J, Shu S, Sims D, et al. The Sorghum bicolor reference  
995 genome: improved assembly, gene annotations, a transcriptome atlas, and signatures of genome  
996 organization. *Plant J Cell Mol Biol*. 2018;93:338–54.
- 50  
997 103. Lê S, Josse J, Husson F. FactoMineR : An R Package for Multivariate Analysis. *J Stat Softw* [Internet]. 2008  
998 [cited 2017 Nov 30];25. Available from: <http://www.jstatsoft.org/v25/i01/>
- 53  
999 104. Josse J, Husson F. missMDA : A Package for Handling Missing Values in Multivariate Data Analysis. *J Stat*  
1000 *Softw* [Internet]. 2016 [cited 2017 Nov 30];70. Available from: <http://www.jstatsoft.org/v70/i01/>

1003

1004

- 1
- 2
- 3
- 4
- 5
- 6
- 7
- 8
- 9
- 10
- 11
- 12
- 13
- 14
- 15
- 16
- 17
- 18
- 19
- 20
- 21
- 22
- 23
- 24
- 25
- 26
- 27
- 28
- 29
- 30
- 31
- 32
- 33
- 34
- 35
- 36
- 37
- 38
- 39
- 40
- 41
- 42
- 43
- 44
- 45
- 46
- 47
- 48
- 49
- 50
- 51
- 52
- 53
- 54
- 55
- 56
- 57
- 58
- 59
- 60
- 61
- 62
- 63
- 64
- 65

16  
17  
18  
19  
20  
21  
22  
23  
24  
25  
26  
27  
28  
29  
30  
31  
32  
33  
34  
35  
36  
37  
38  
39  
40  
41  
42  
43  
44  
45  
46  
47  
48  
49  
50  
51  
52  
53  
54  
55  
56  
57  
58  
59  
60  
61  
62  
63  
64  
65

**Table 1 – Genome sequencing:** Technology and assembly details and gene prediction features.

|                                    | Description                            | Genomic DNA                               | BAC clones                                 |
|------------------------------------|----------------------------------------|-------------------------------------------|--------------------------------------------|
| Sequencing and assembly data       | Sequencing Data                        | 26 Illumina synthetic long-read libraries | Single end Roche 454 of BAC library clones |
|                                    | Total Sequence                         | 19 Gb                                     | 6,6 Gb                                     |
|                                    | Genome                                 | 1.9 x                                     | 0.66 x                                     |
|                                    | Read length Min/Max                    | 1,500 bp / 22,904 bp                      | 8 bp / 2611 bp                             |
|                                    | Mean read length                       | 4,930 bp                                  | 368.5 bp                                   |
|                                    | Assembler Software                     | Celera Assembler (Overlap Graph)          | PHRAP/CONSED                               |
|                                    | Total reads used in assembly           | 3,857,849                                 | 17,894,306                                 |
|                                    | Total assembly size                    | 4.26 Gb                                   | 49.6 Mb                                    |
|                                    | Number of unitigs/contigs + singletons | 450,609                                   | 463                                        |
|                                    | Contigs Length Min/Max/Mean            | 1,500 bp / 468,011 bp / 9,452 bp          | 11,723 bp / 235,533 bp / 107,129 bp        |
| NG50                               | 41,394 bp                              | 109,618 bp                                |                                            |
| N50                                | 13,157 bp                              | N/A                                       |                                            |
| Gene prediction features           | # genes                                | 373,869                                   | 3,550                                      |
|                                    | # transcripts                          | 374,774                                   | -                                          |
|                                    | # exons                                | 1,035,764                                 | 13,132                                     |
|                                    | Average GC content                     | 43.20%                                    | 44.99%                                     |
|                                    | Average # exons per gene               | 2.8                                       | 3.7                                        |
|                                    | Average exon size [bp]                 | 291                                       | 271.8                                      |
|                                    | Median exon size [bp]                  | 171                                       | 154                                        |
|                                    | Average intron size [bp]               | 352.6                                     | 539.2                                      |
|                                    | Median intron size [bp]                | 132                                       | 139                                        |
|                                    | Average gene size [bp] with UTR        | 1,437.80                                  | 2,429.20                                   |
| Median gene size [bp] with UTR     | 806                                    | 1,260.50                                  |                                            |
| Average gene size [bp] without UTR | 1,318.80                               | 2,351.30                                  |                                            |
| Median gene size [bp] without UTR  | 771                                    | 1,199.50                                  |                                            |
| Average gene density (kb per gene) | 11.4                                   | 14                                        |                                            |



1008

1009 **Figure captions**

1010

1011

1012

1013

1014

1015

1016

1017

1018

1019

1020

1021

1022

1023

1024

1025

1026

1027

1028

1029

1030

1031

1032

1033

1034

1035

1036

1037

1038

1039

1040

1041

1042

1043

1044

1045

44

45

46

47

48

49

50

51

52

53

54

55

56

57

58

59

60

61

62

63

64

65

**Fig. 1 – Gene copy number estimation.** (A) Distribution of copy counts for putative single copy genes. A total of 1,592 single copy genes from sorghum, rice and *Brachypodium* matched sugarcane predicted genes. More than 99.9% of the aligned single copy genes are present between one and 15 times in the sugarcane gene models. (B) Copy differentiation between sugarcane coding sequences (CDS) and upstream regions, based on pairwise sequence alignment of gene clusters. Genetic dissimilarity increases with increasing distance from the translation start site. (C) Indel length distribution in sugarcane gene copies. Frame preserving indels are more common than frameshifts for this set of genes.

**Fig. 2 – Homo (eo)log expression:** Frequency of sugarcane genes plotted against the total number of homo(eo)logs per gene and the number of expressed homo(eo)logs per gene. Genes with cDNAs aligned with FPKM > 1 were considered expressed. Plots show sense (A) and antisense (B) transcripts. Reads from Ion PGM Sequencing were used, as strand orientation is maintained [29].

**Fig. 3 – Phylogenetic, expression and TFBS categorization of SuSy and PAL gene family.** Phylogenetic analysis of (A) sucrose synthase (SuSy) and (B) phenylalanine-ammonia lyase (PAL) genes from SP80-3280, R570, *S. spontaneum*, and sorghum. SuSy sequences from *Saccharum* ssp [35] were also included. Core promoter analysis suggests ScSuSy2 (C) and most ScPAL (D) as TATA-less and TFBS specific for each clade. The three ScPAL genes marked (\*) are present in the same contig. Transposable elements (TEs) were identified within 10 kb upstream from the gene. Heatmap analysis of RNA-Seq data [29] shows more pronounced expression in SP80-3280 internodes of ScSuSy1, ScSuSy2, ScSuSy5 and ScPAL from Clade V. RNA-Seq of leaf tissues indicates more pronounced expression of ScPAL from Clades II and III. ScSuSy4 presents high numbers of TFBS and TE and low expression in all samples.

**Fig. 4 – SNP variants.** Alignment of sugarcane contigs to the genic regions of sorghum chromosomes (chromosome 1 is on top and 10 is at the bottom). X and Y axes indicate physical distance on each chromosome (mega base pairs, Mb) and the number of single nucleotide variants compared to the sorghum reference genome, respectively. Each dot indicates sorghum genes matching two or more sugarcane contigs.

**Fig. 5 – Pseudoassembly of contigs.** Multiple correspondence analysis (MCA) with hierarchical clustering of the SP80-3280 assembly against the *S. spontaneum* tetraploid AP85-441 homo(eo)log-resolved assembly [14] and the R570 [13] monoplloid genome. A: SP80-3280 contigs best hits against AP85-441 and R579 chromosomes and corresponding size of the preliminary scaffolds; Cluster = hierarchical cluster from the MCA. B and C: Circos plot of the proportion of proteins from SP80-3280 (classified into one of the 6 clusters or as ‘non-clustered’) that align to the AP85-441 and R570 putative chromosomes, respectively.

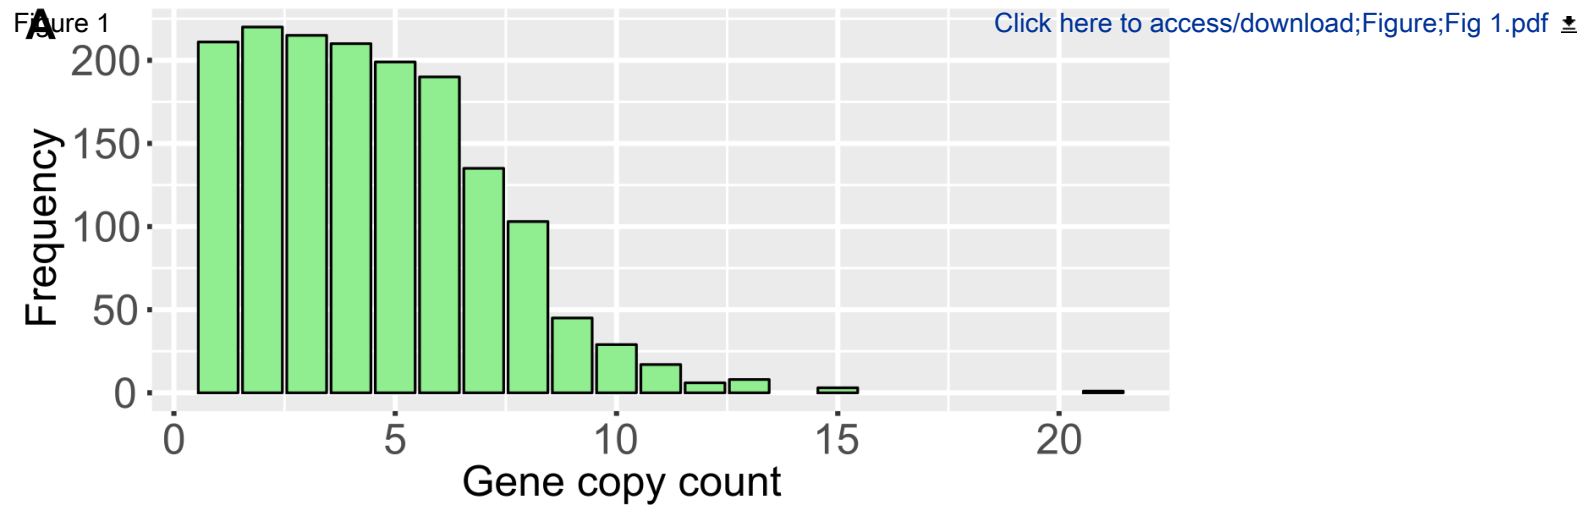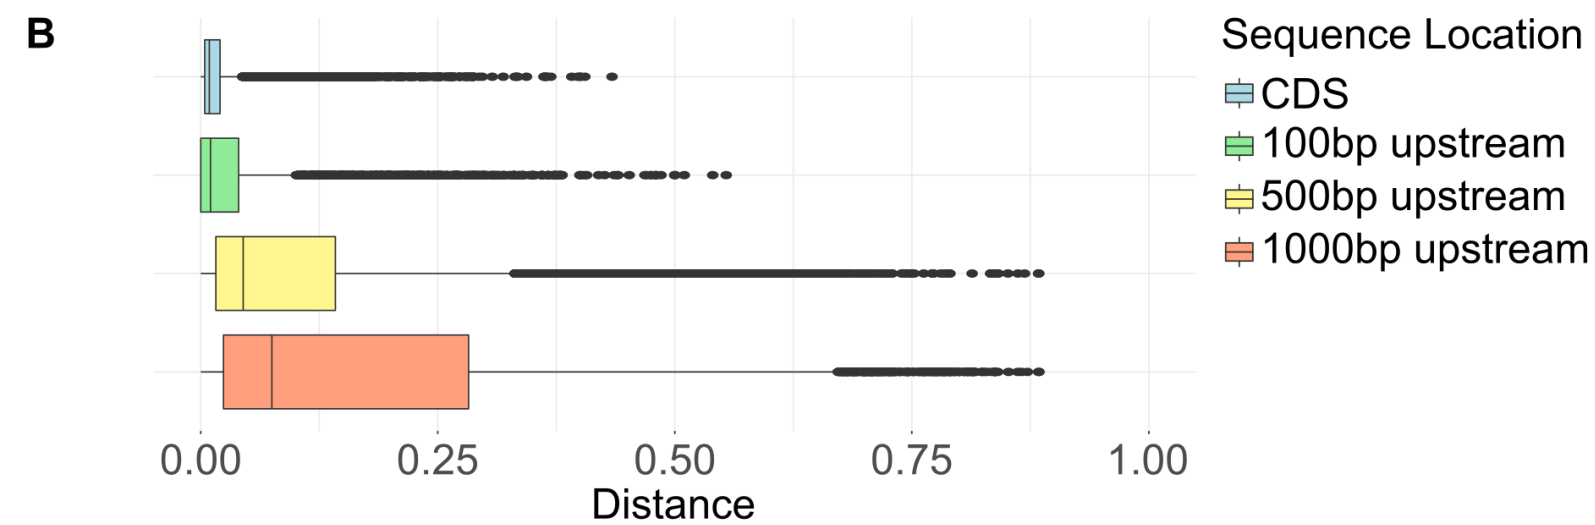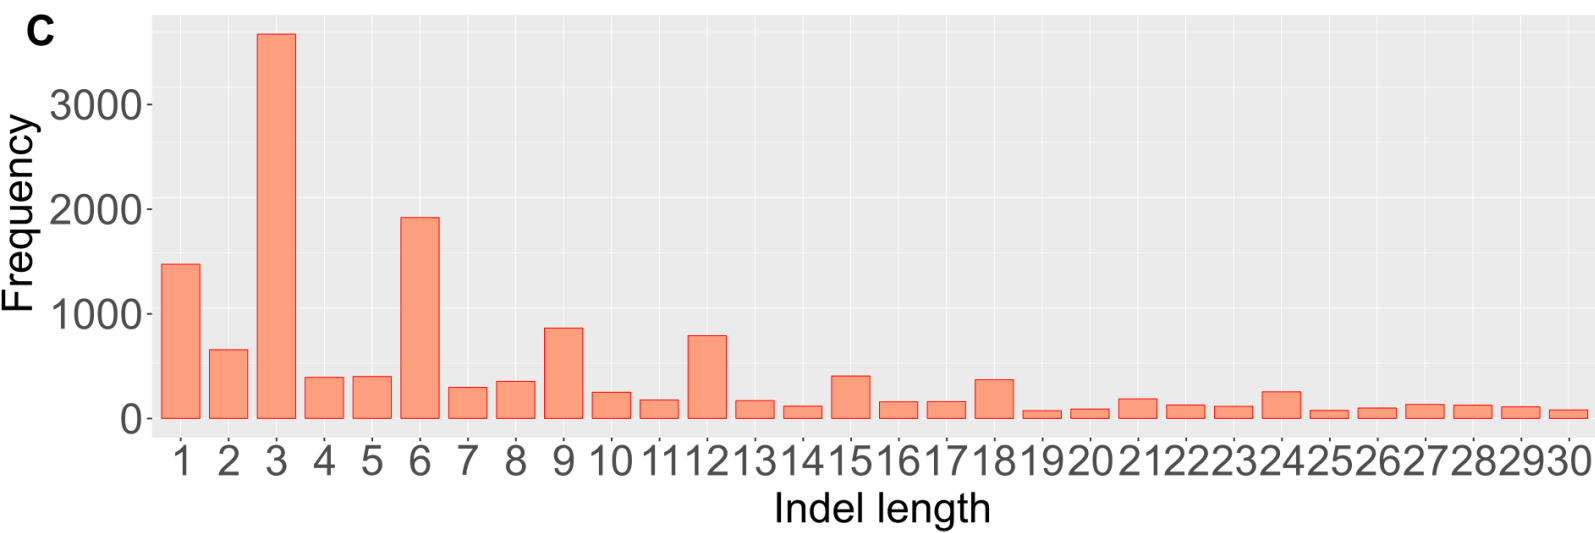



**Figure 3**

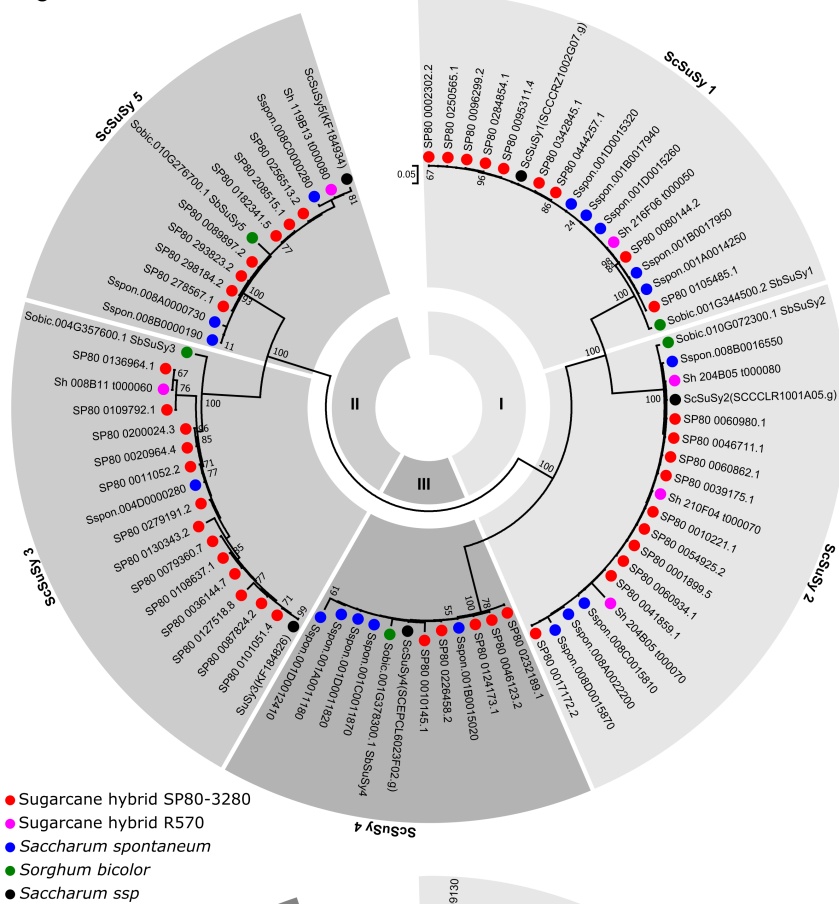

**B**

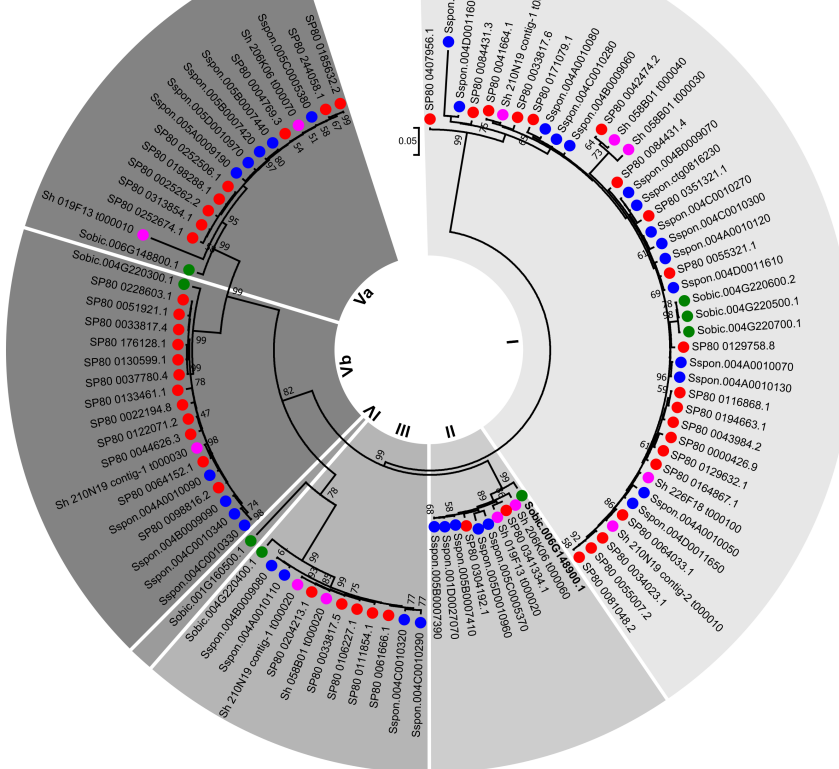

**C**

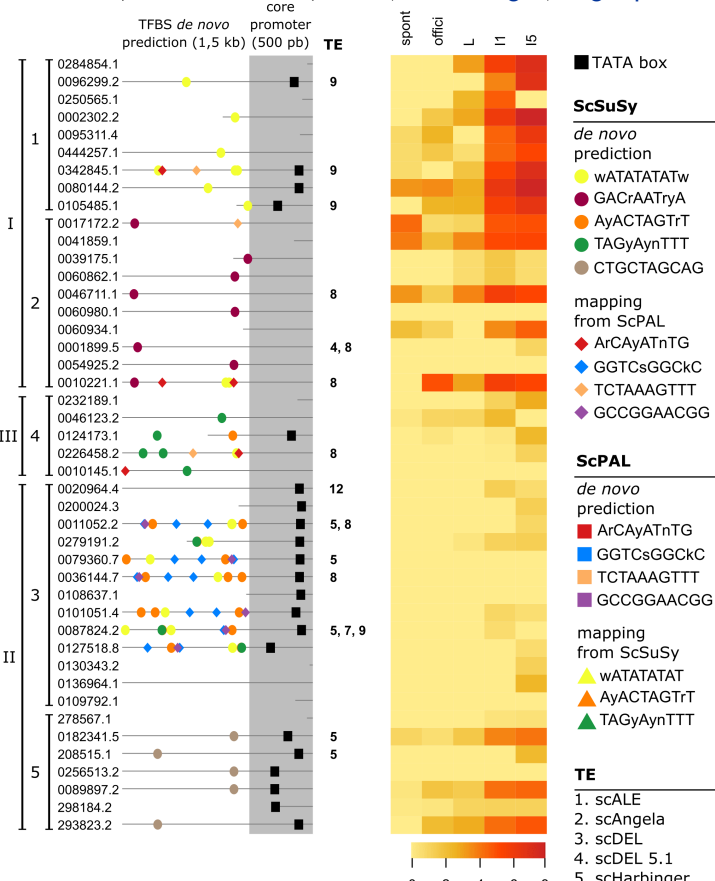

**D**

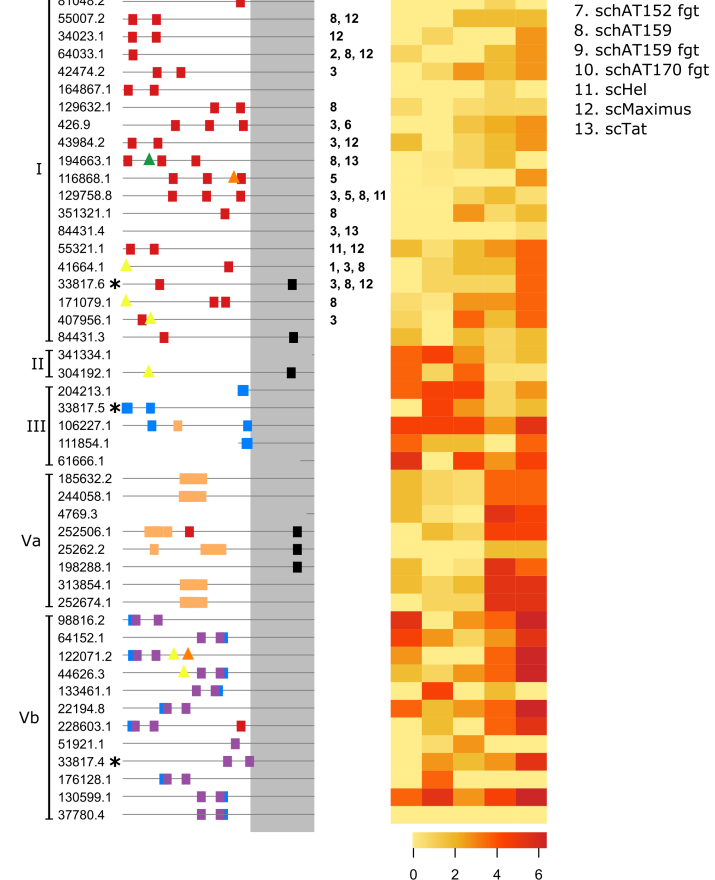



Figure 5

A

| Cluster         | Number of Contigs | bp                   | Chromosomal Correspondence |         |
|-----------------|-------------------|----------------------|----------------------------|---------|
|                 |                   |                      | <i>S. spontaneum</i>       | R570    |
| 1               | 60,150            | 567,792,642          | 4                          | 4       |
| 2               | 61,705            | 574,401,531          | 1                          | 1       |
| 3               | 87,155            | 823,254,612          | 7, 8                       | 8, 9 10 |
| 4               | 90,152            | 896,362,990          | 5, 6                       | 5, 6, 7 |
| 5               | 63,996            | 679,392,733          | 2                          | 2       |
| 6               | 55,313            | 565,012,329          | 3                          | 3       |
| <b>Total</b>    | <b>418,471</b>    | <b>4,106,216,837</b> | -                          | -       |
| <b>Original</b> | <b>450,609</b>    | <b>4,259,506,050</b> | -                          | -       |

B

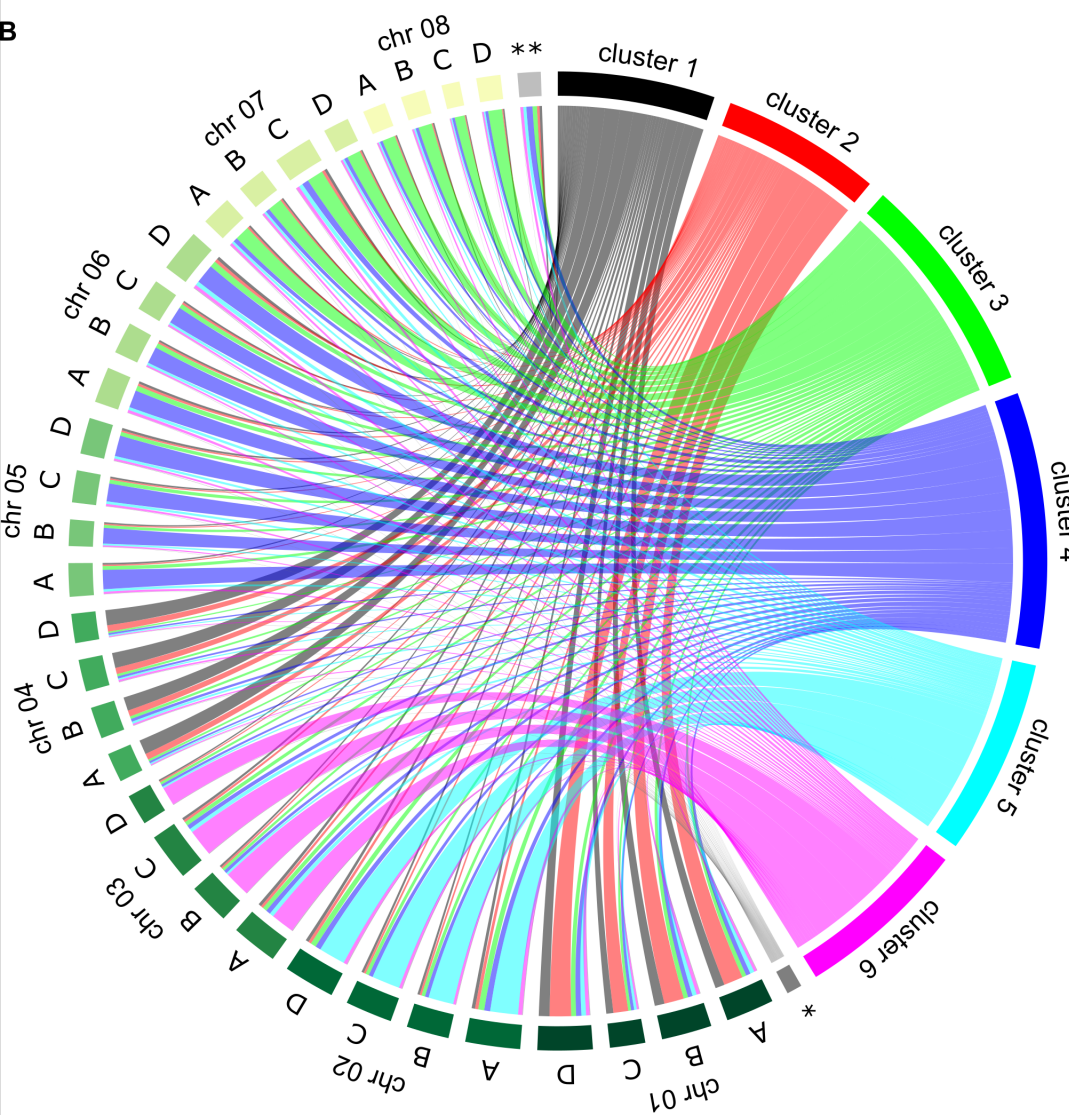

C

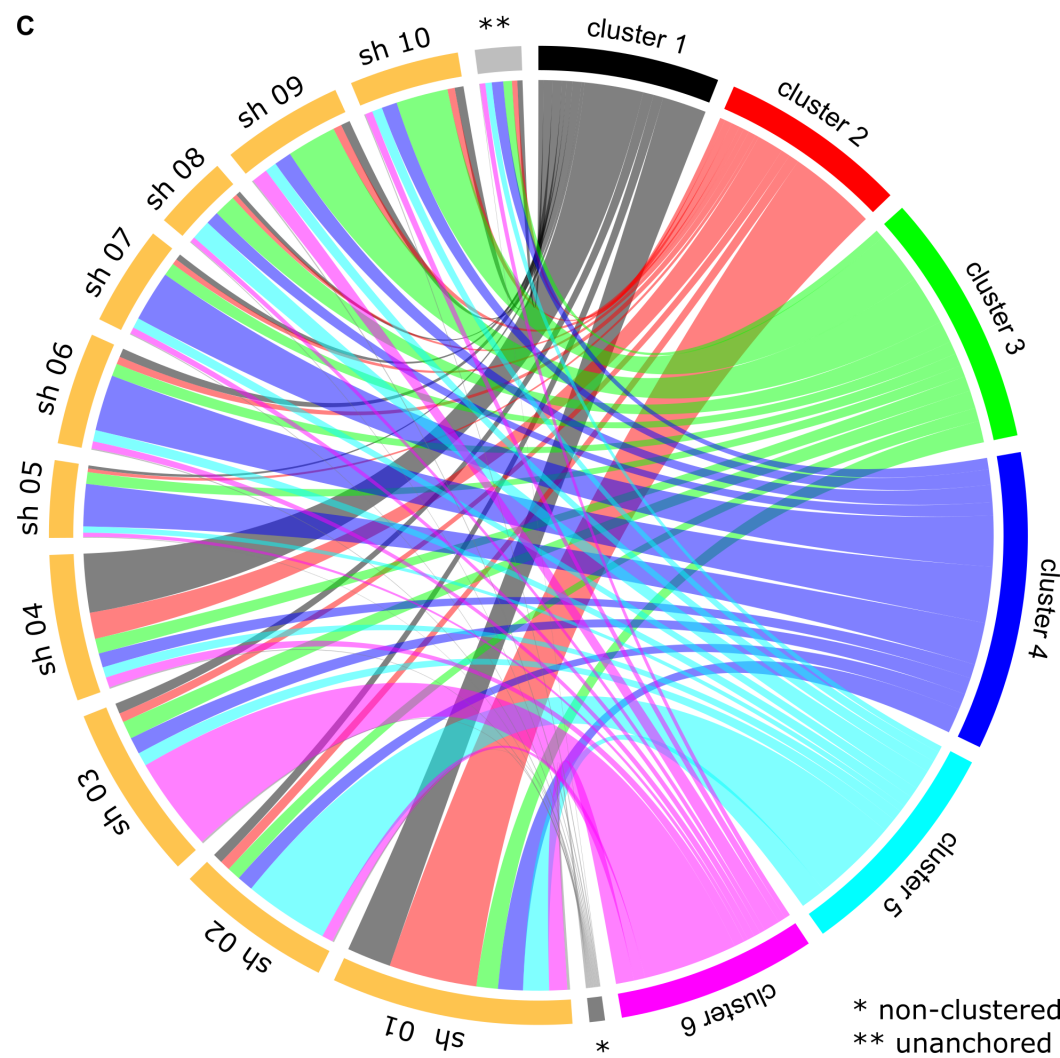

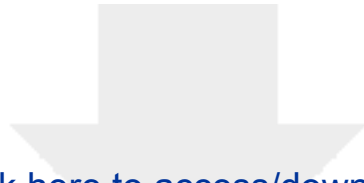

[Click here to access/download](#)

**Supplementary Material**

[Souza and Van Sluys et al Additional file 1.docx](#)

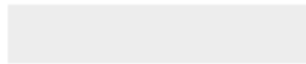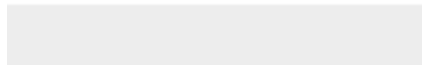

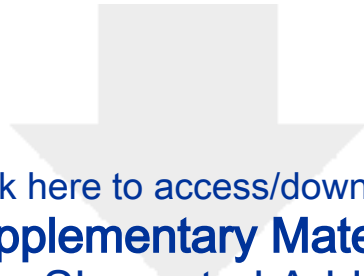

[Click here to access/download](#)

**Supplementary Material**

Souza and Van Sluys et al Additional file 2.xls

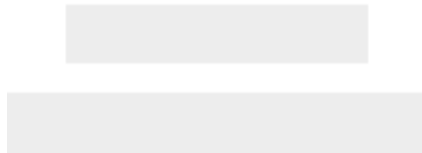



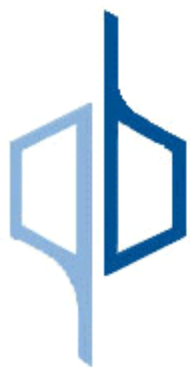

Universidade de São Paulo  
Instituto de Química

Departamento de Bioquímica

Dear Laurie Goodman,  
Editor-in-Chief  
GigaScience

On behalf of the co-authors, we would like to submit for your consideration the manuscript by Souza, Van Sluys and colleagues entitled “Assembly of the 373K gene space of the polyploid sugarcane genome reveals reservoirs of functional diversity in the world’s leading biomass crop”.

We sequenced the genome of a sugarcane commercial hybrid and were able to produce a high-quality assembly that resolved the homo(eo)logs of the intricate *Saccharum* complex.

Our assembly contains 373,869 genes from a modern commercial cultivar (SP80-3280) used in breeding programs to generate new varieties and that for many years has been the reference of genomic studies. It is important to note that the assembly offers for the first-time access to the gene-space copy-resolved content of interspecific polyploid commercial sugarcane including gene promoters and a gene network analysis. We produced transcriptome data of field grown sugarcane harvested from planting to maturation including four tissues and found regulatory elements of co-expressed genes within a gene network associated with fiber metabolism. They show promoter regions with different transcription factor binding sites associated to differentially expressed genes. In addition, annotation of transposable elements contributed to fine-tuning the observed gene diversity in an otherwise highly syntenic genome with Sorghum.

Our gene space of 373 thousand genes represents a much closer representation of the gene content diversity of *Saccharum* adding valuable new data to previous studies by Gasmour et al., 2018 (doi: 10.1038/s41467-018-05051-5), Zhang et al., 2018 (<https://www.nature.com/articles/s41588-018-0237-2>), Riaño-Pachón and Mattiello, 2017 (doi: <https://doi.org/10.12688/f1000research.11859.2>). In addition, our genome sequence supports its recent allotetraploid nature.

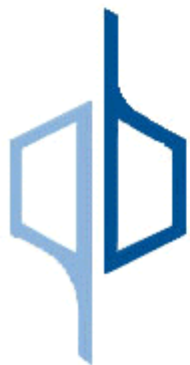

Universidade de São Paulo  
Instituto de Química

---

The data set is a fundamental and large step toward a high-quality chromosome resolved assembly from a current commercial hybrid. We note that as the wheat sequencing genome effort, a multi-initiative is necessary to approach complex genomes, but different from wheat, sugarcane genetics is hindered by it being mainly propagated through cuttings and crosses being performed only for breeding purposes. The availability of a polyploid gene-space will be a valuable step towards breeding in a plant extraordinarily difficult to yield genetic maps.

This Whole Genome Shotgun project is publicly available at NCBI under GenBank Bioproject PRJNA431722. Finally, we assure that all gene/protein names and symbols used in this manuscript are in accordance to approved nomenclature guidelines for Saccharum species.

We hope you find this achievement to be of interest to GigaScience and look forward to hearing from you.

Sincerely,

**Glaucia Mendes Souza**

Full Professor

Institute of Chemistry

University of São Paulo

**Marie-Anne Van Sluys**

Full Professor

Biosciences Institute

University of São Paulo
