# Supplementary material for: Assembly of the 373k gene space of the polyploid sugarcane genome reveals reservoirs of functional diversity in the world's leading biomass crop
Source: PubMed Central journal article supplement (PMC6884061; doi:10.1093/gigascience/giz129), 2019-11-29
Supplement: giz129_response_to_reviewer_comments_revision_2.pdf [file giz129_response_to_reviewer_comments_revision_2.pdf]

## Author's Response To Reviewer Comments

Close

We have uploaded our final version of the manuscript with data citation and updated funding information.

Close
